# Supplementary material for: Runoff from glacier ice and seasonal snow in High Asia: separating melt water sources in river flow
Source: Springer Nature journal article supplement (doi:10.1007/s10113-018-1429-0), 2018-11-10

**Journal:** Regional Environmental Change

**Article:** Runoff from glacier ice and seasonal snow in High Asia: separating melt water sources in river flow

**Authors:** Richard L. Armstrong<sup>1,2</sup>, Karl Rittger<sup>1,2</sup>, Mary J. Brodzik<sup>1,2</sup>, Adina Racoviteanu<sup>1,4</sup>, Andrew P. Barrett<sup>1,2</sup>, Siri-Jodha Singh Khalsa<sup>1,2</sup>, Bruce Raup<sup>1,2</sup>, Alice F. Hill<sup>1,2</sup>, Alia Khan<sup>1,2</sup>, Alana M. Wilson<sup>1,2</sup>, Rijan Bhakta Kayastha<sup>4</sup>, Florence Fetterer<sup>1,2</sup>, Betsy Armstrong<sup>1,2</sup>

**Affiliations:** <sup>1</sup>National Snow and Ice Data Center, <sup>2</sup>University of Colorado, <sup>3</sup>Kathmandu University, <sup>4</sup>Aberystwyth University, <sup>5</sup>Institute of Arctic and Alpine Research

**Corresponding author:** Richard L. Armstrong, [rlax@nsidc.org](mailto:rlax@nsidc.org), 303-494-7040

[Figure found on the following 4 pages]

**Fig. S3 (a-d):** Comparison of uncorrected downscaled European Reanalysis (ERA)-Interim temperatures with observed temperatures at 13 meteorological sites in the Upper Indus basin for the period 2001 to 2010 for a) winter (DJF), b) spring (MAM), c) summer (JJA) and d) autumn (SON). The mean seasonal cycle has been removed. Correlation coefficient and root mean square error (RMSE) is shown for each site.

(a)

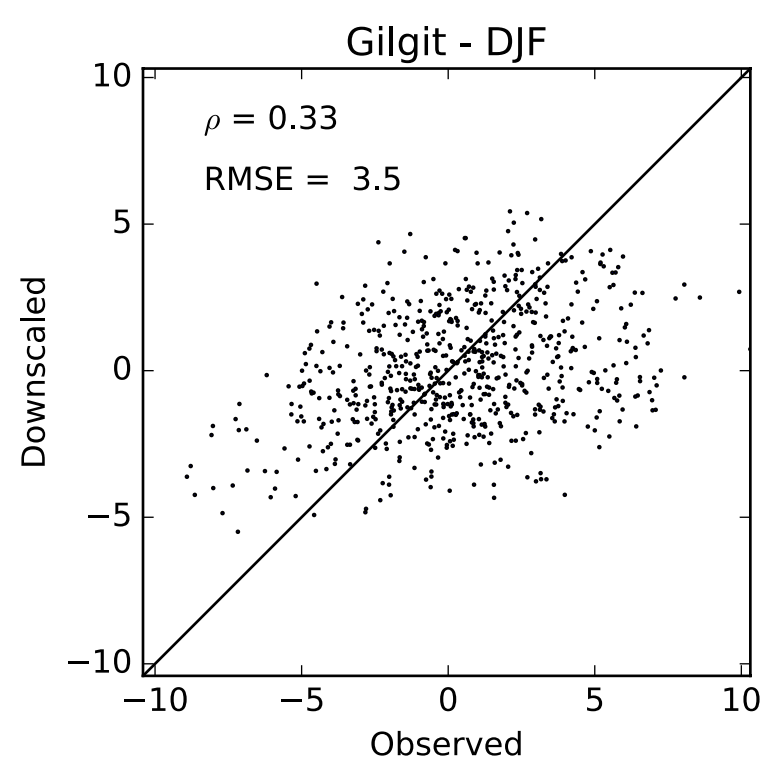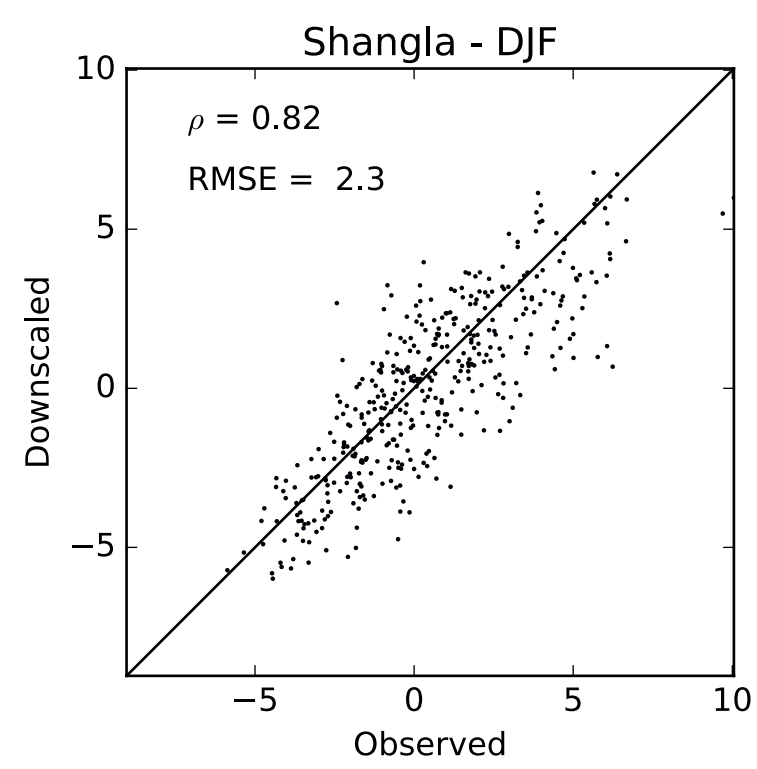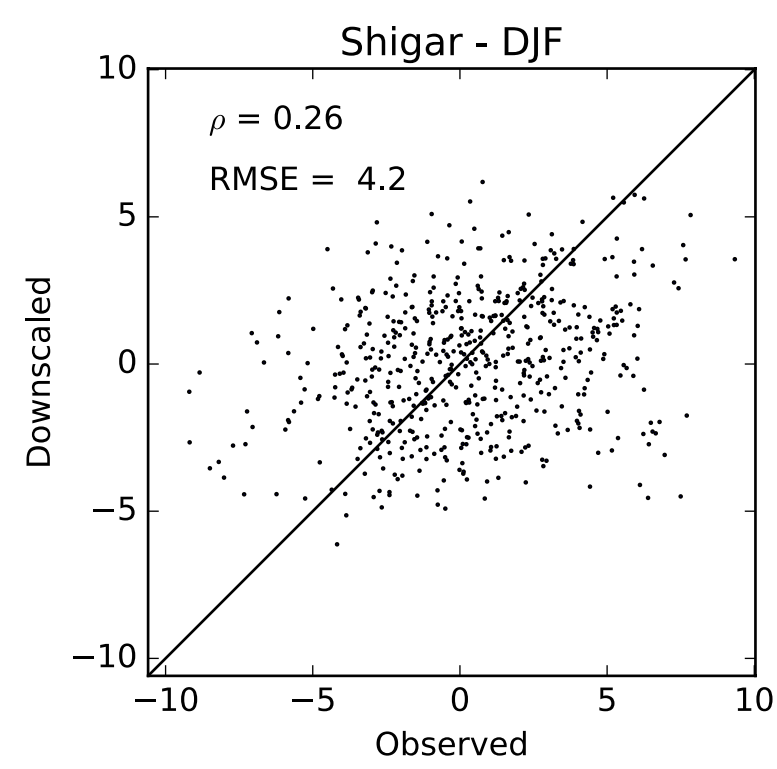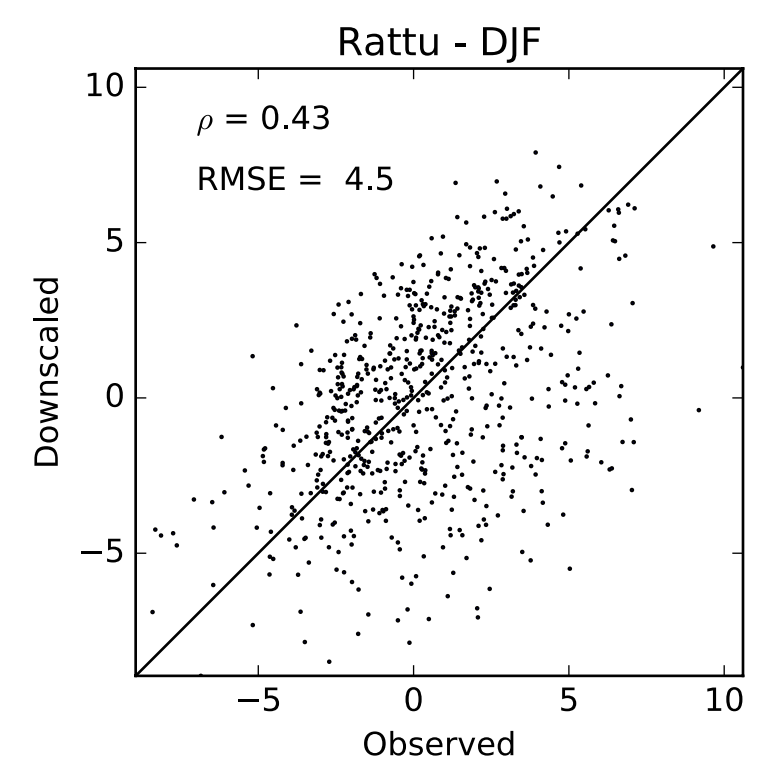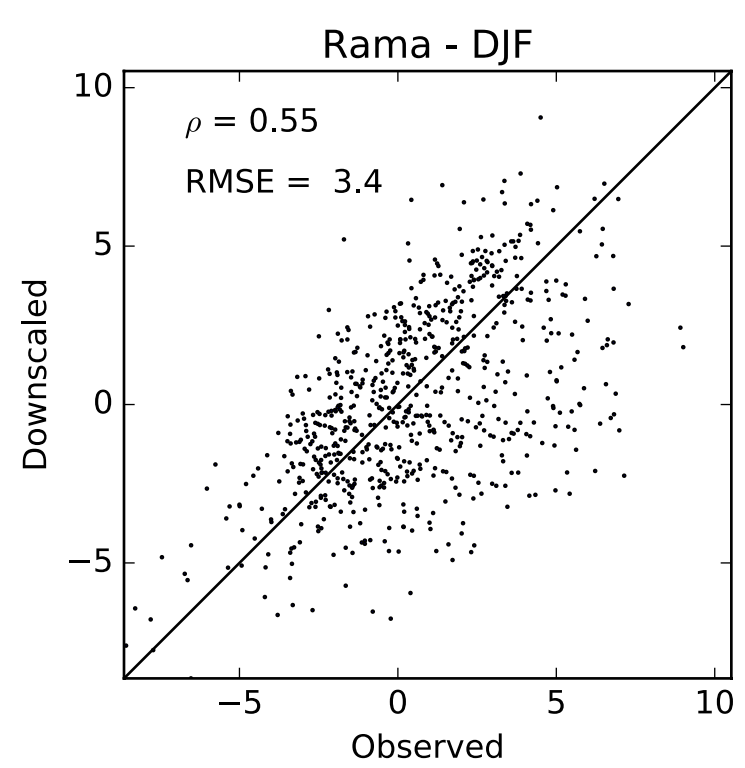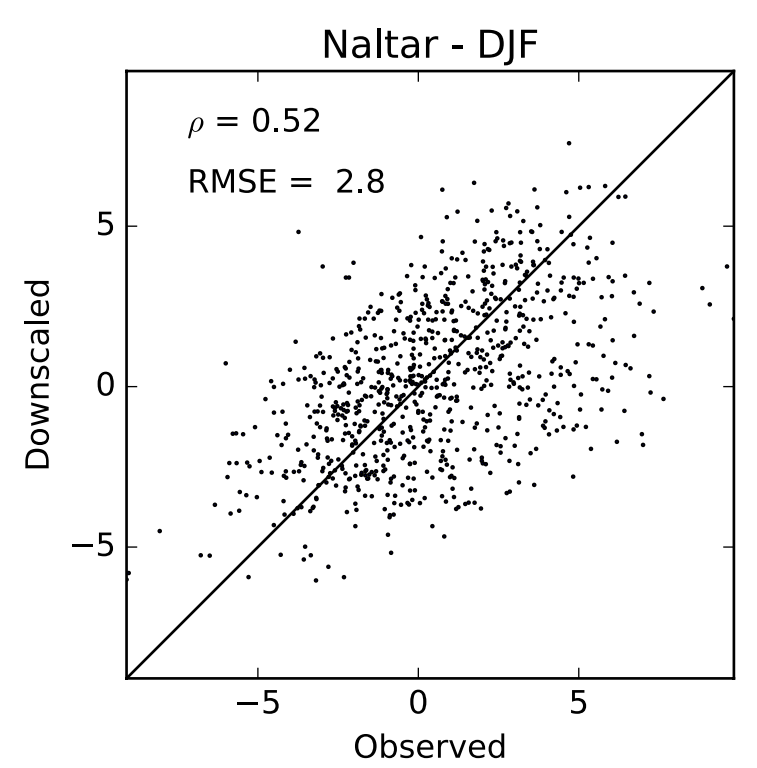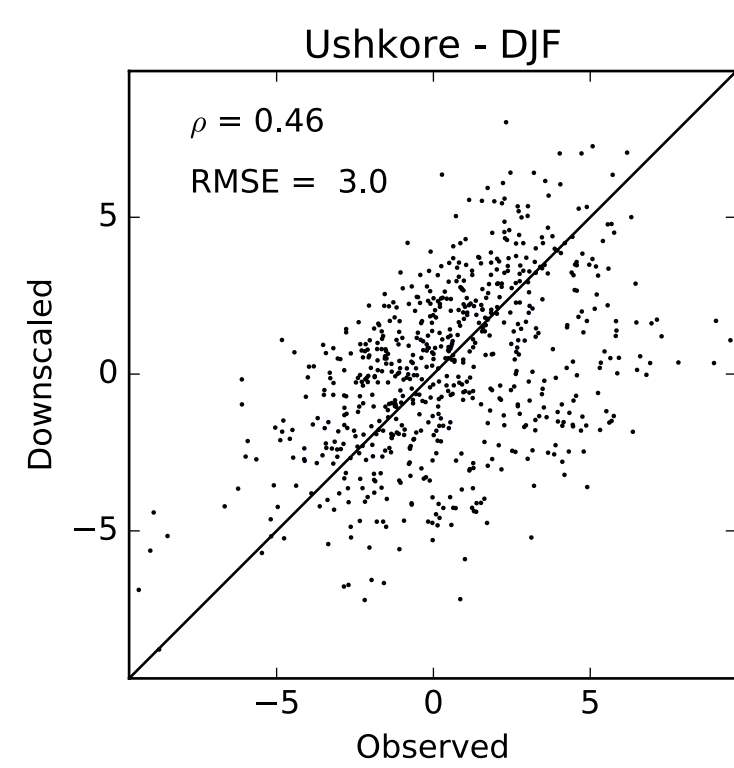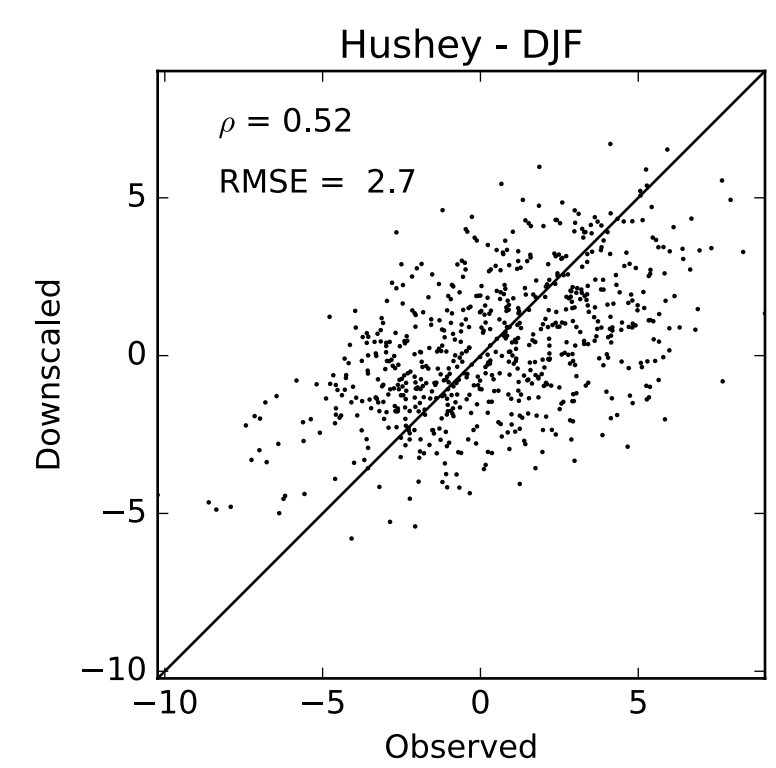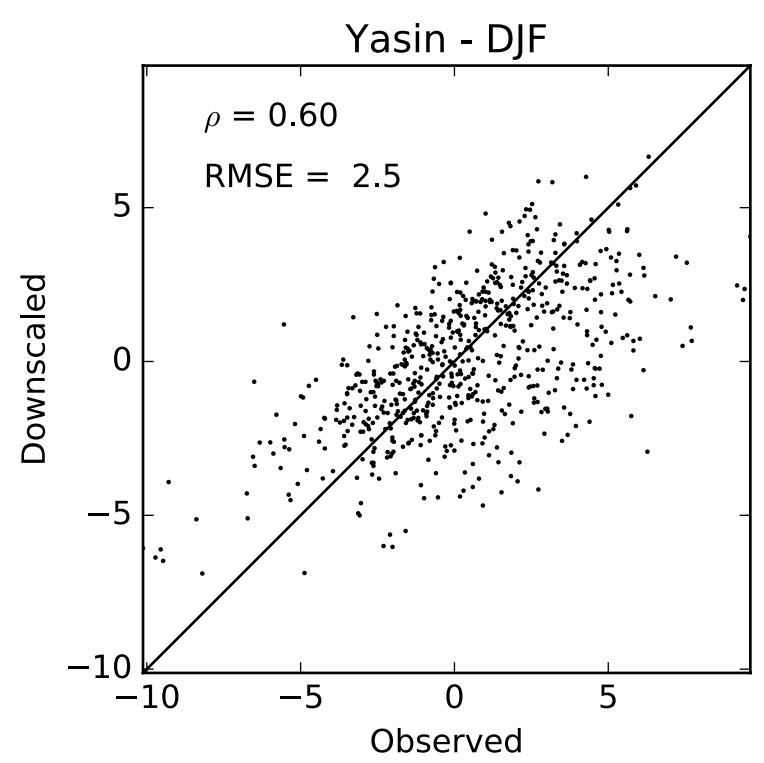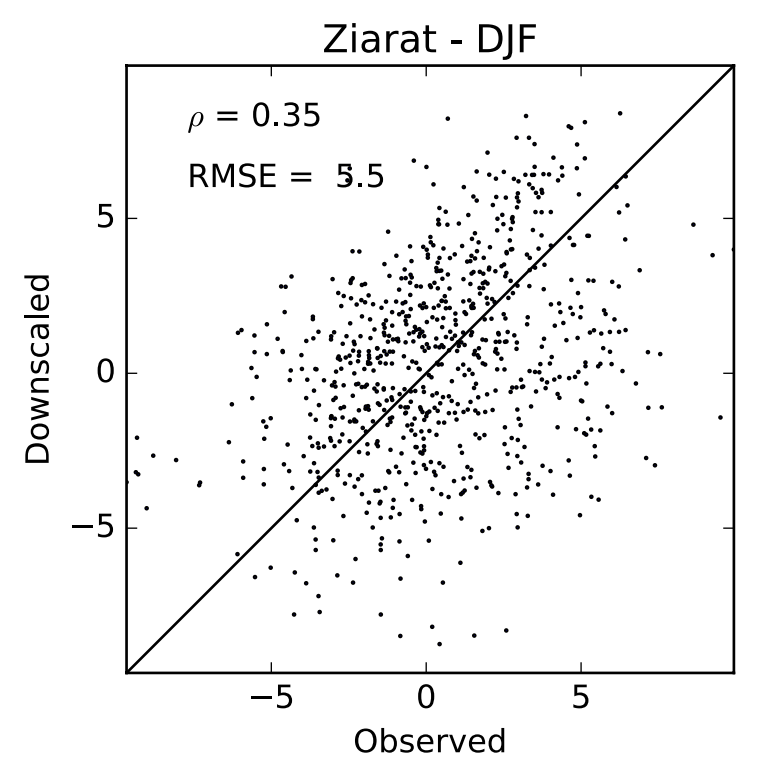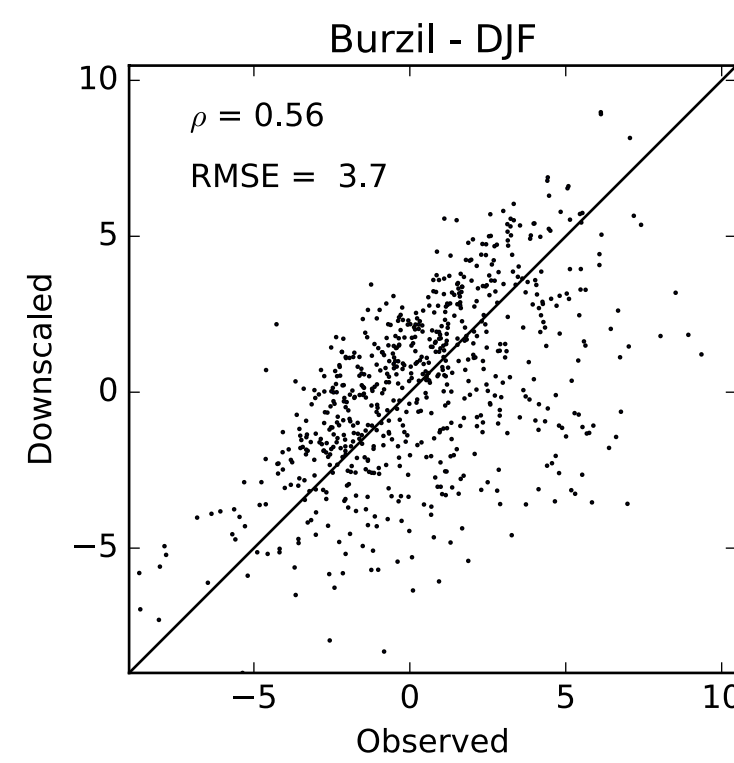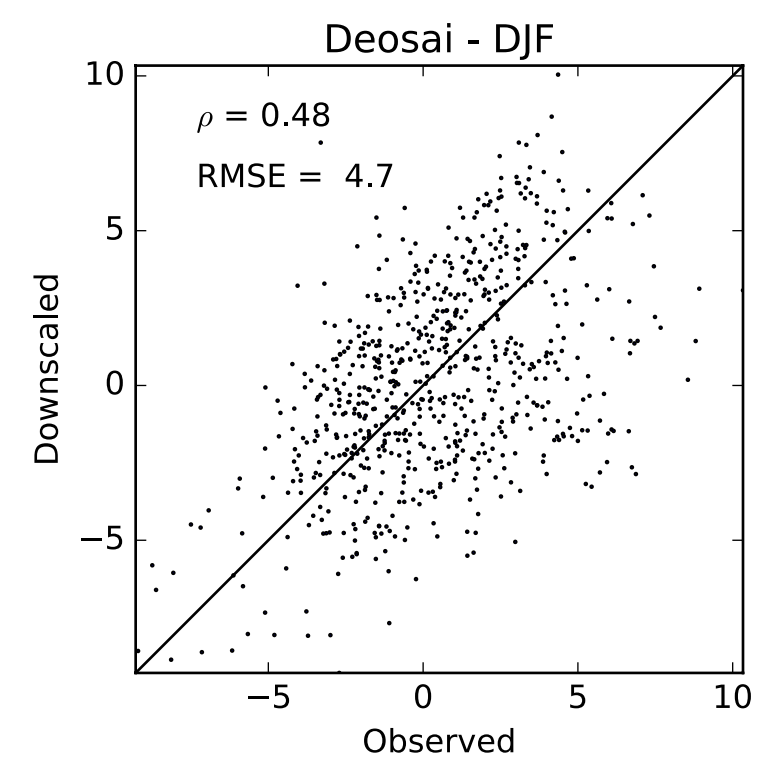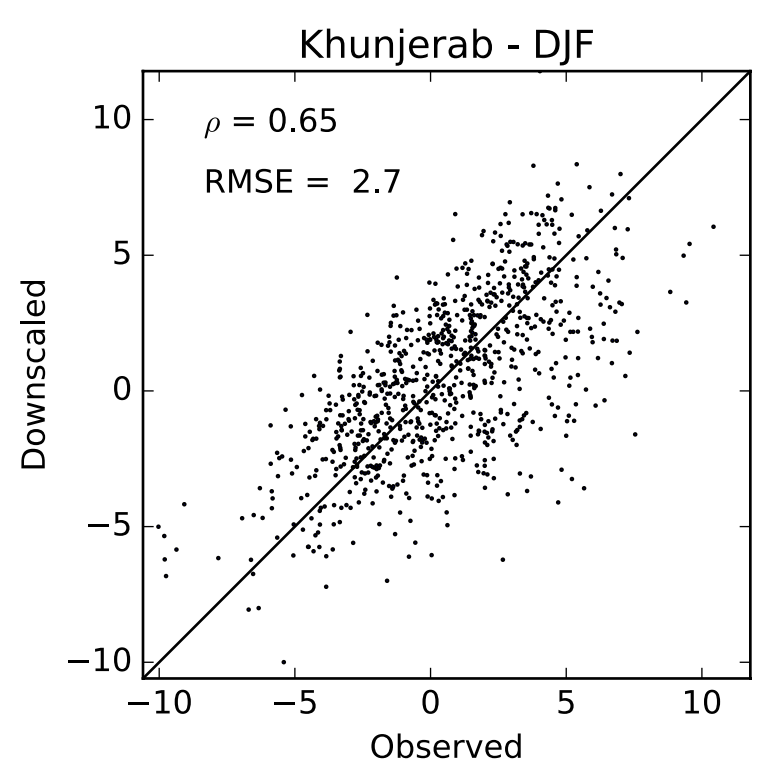

(b)

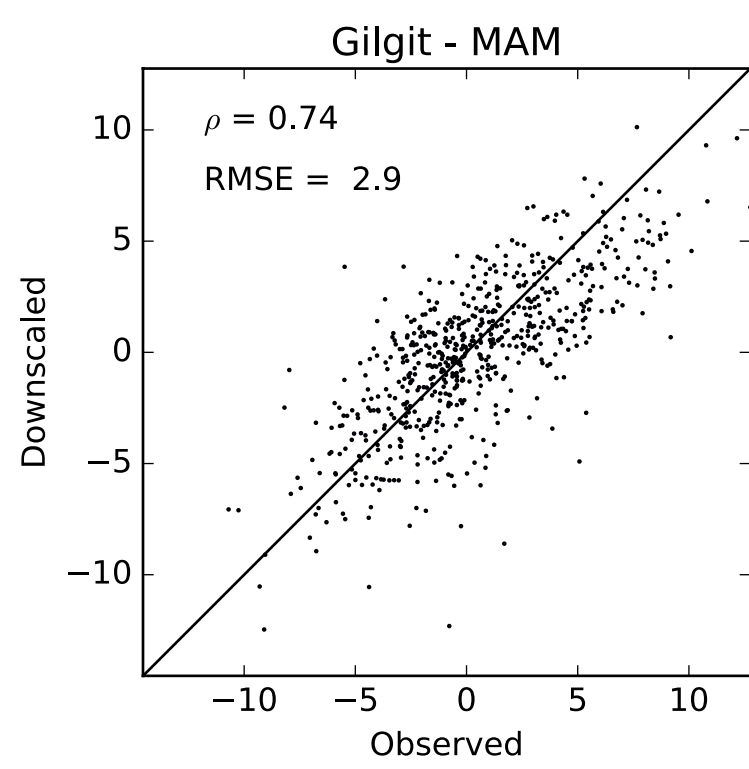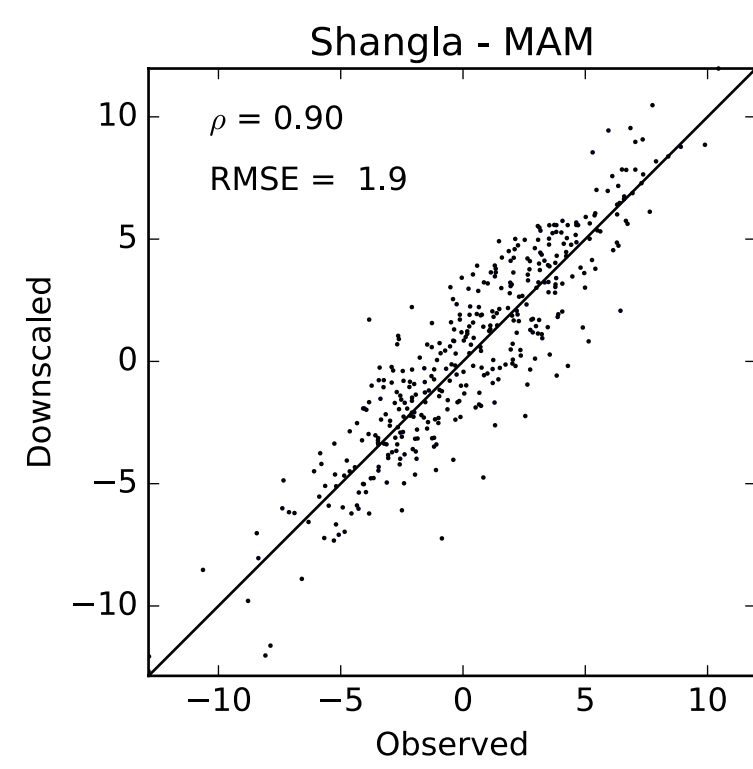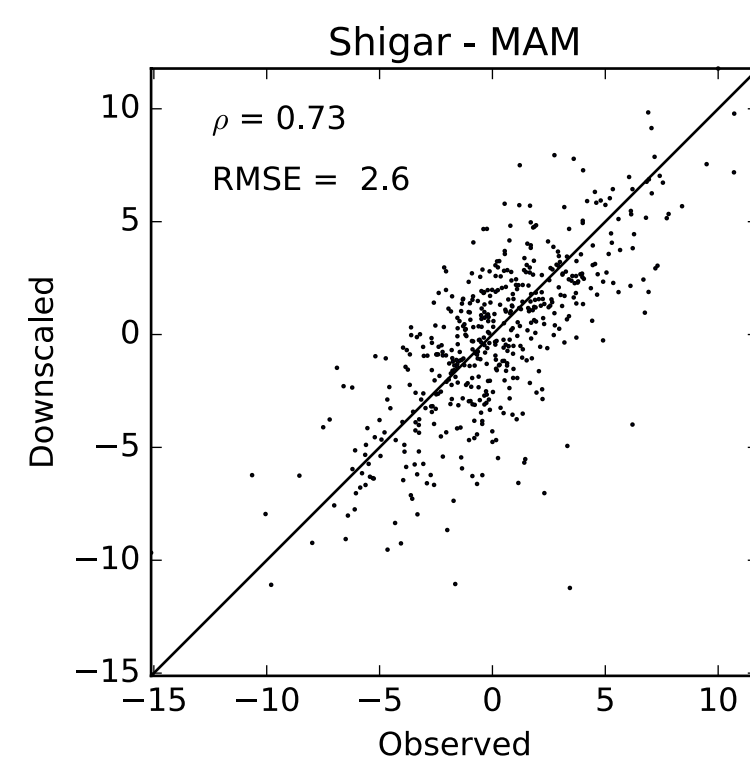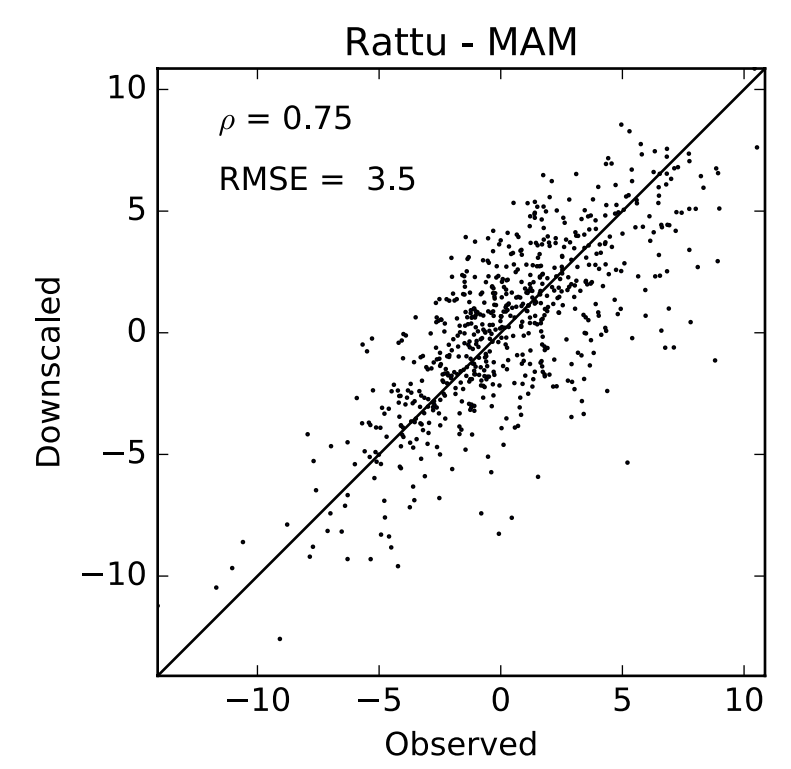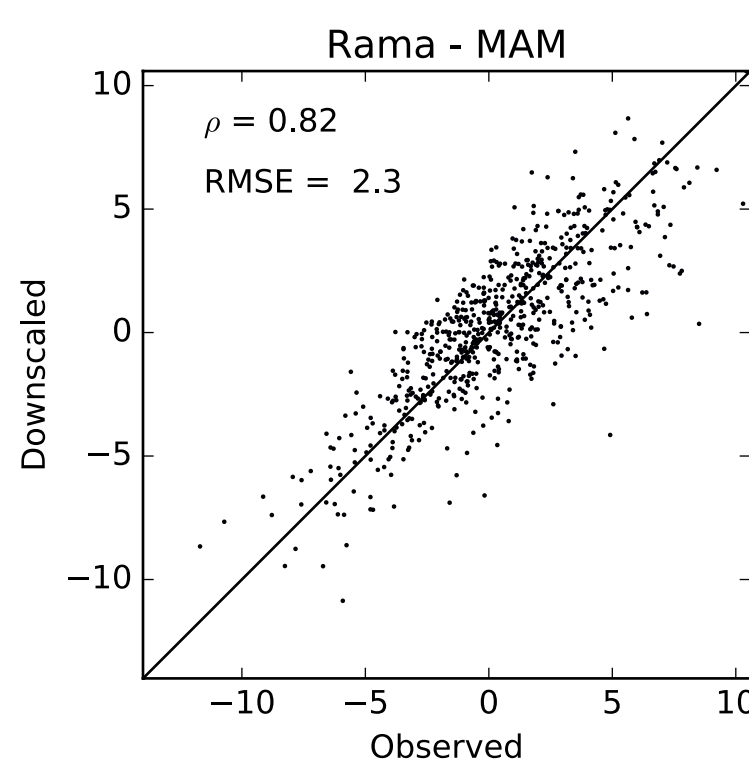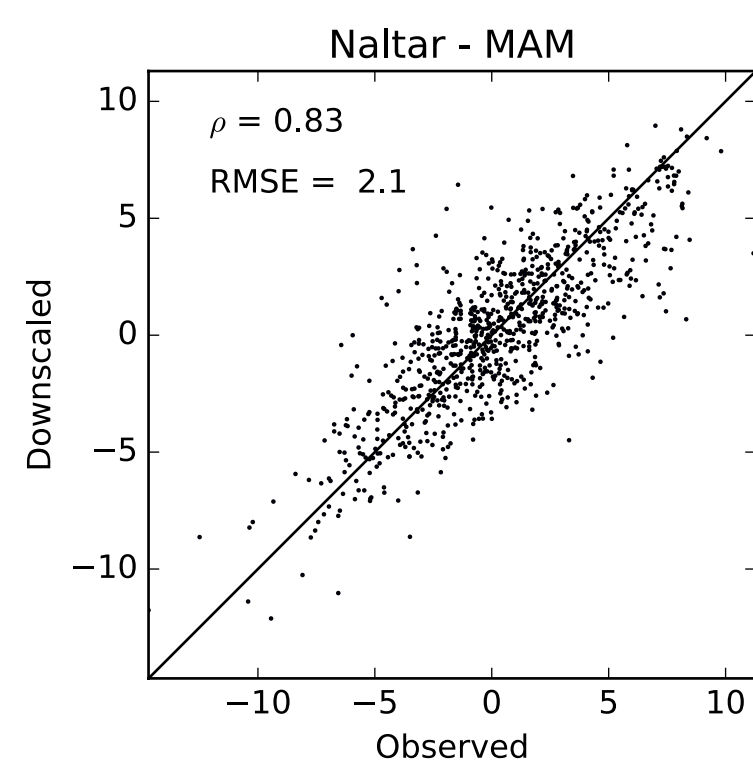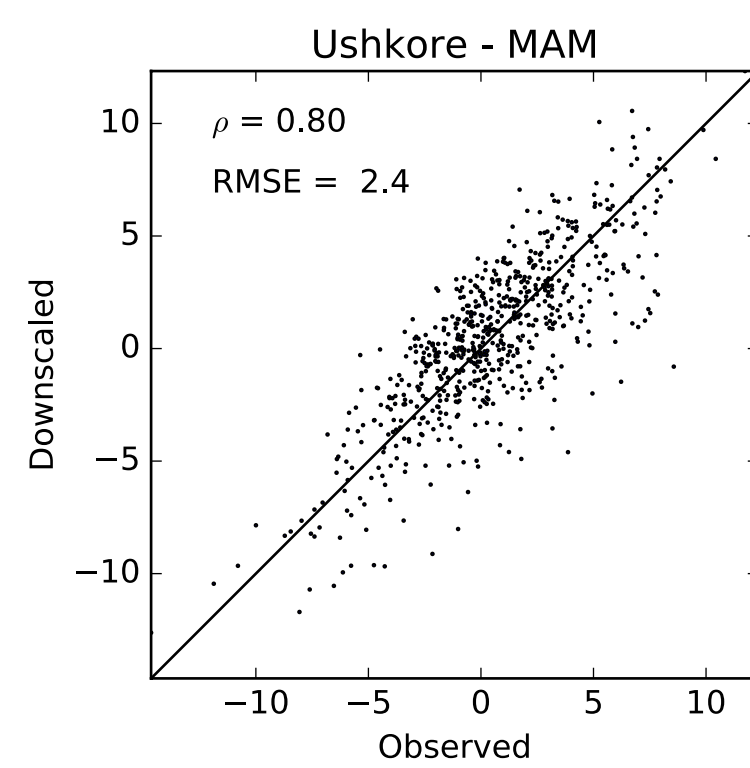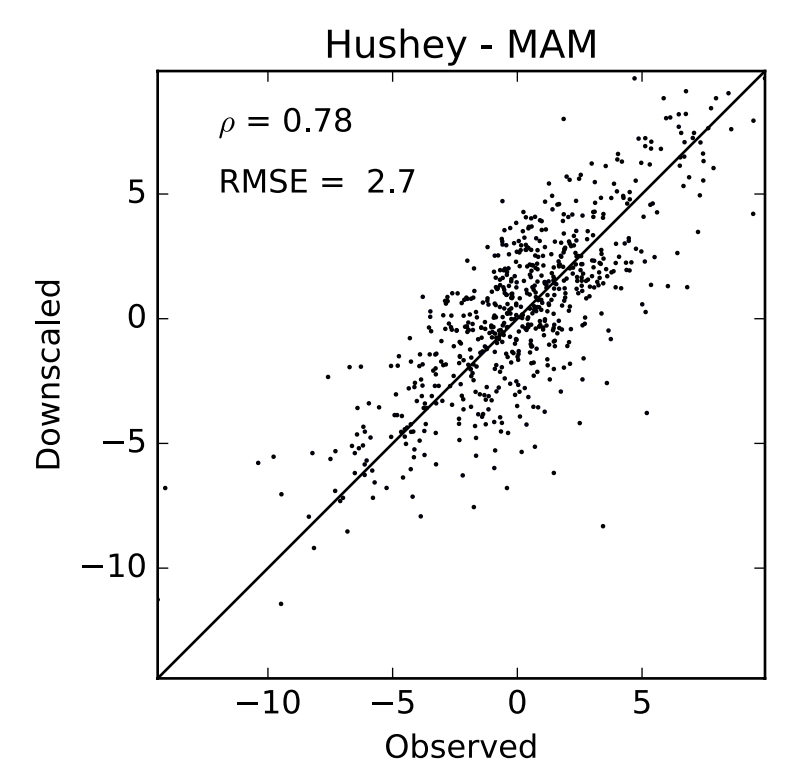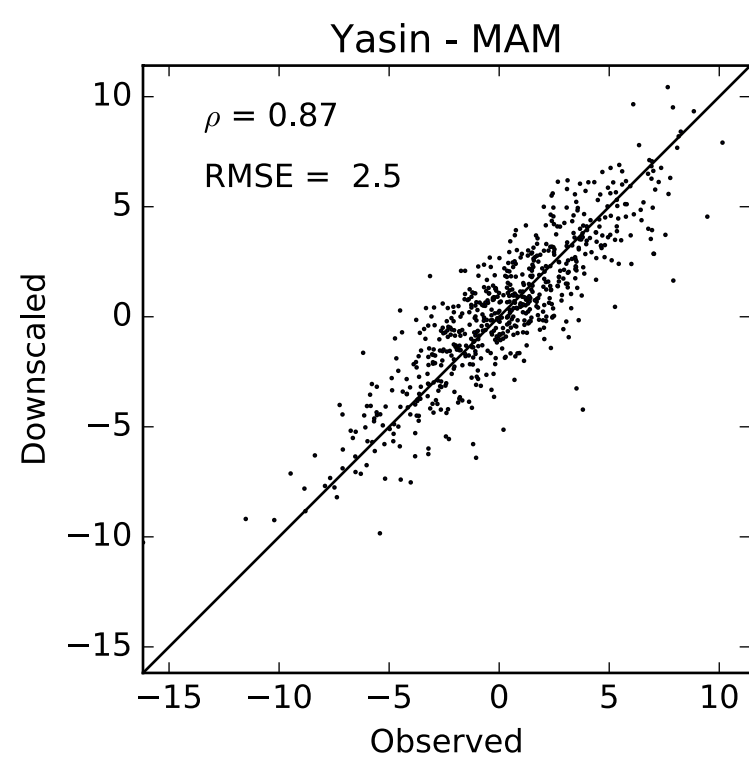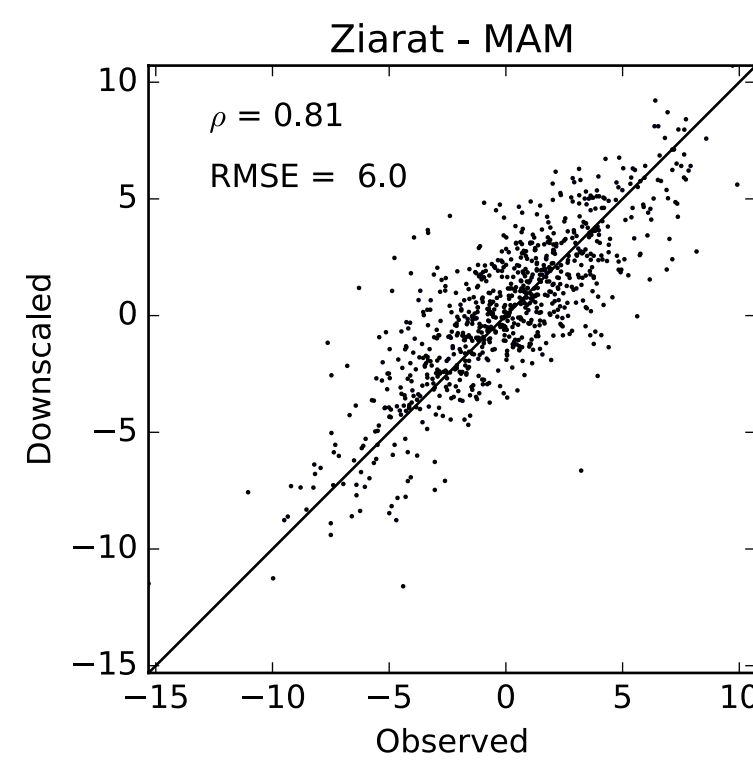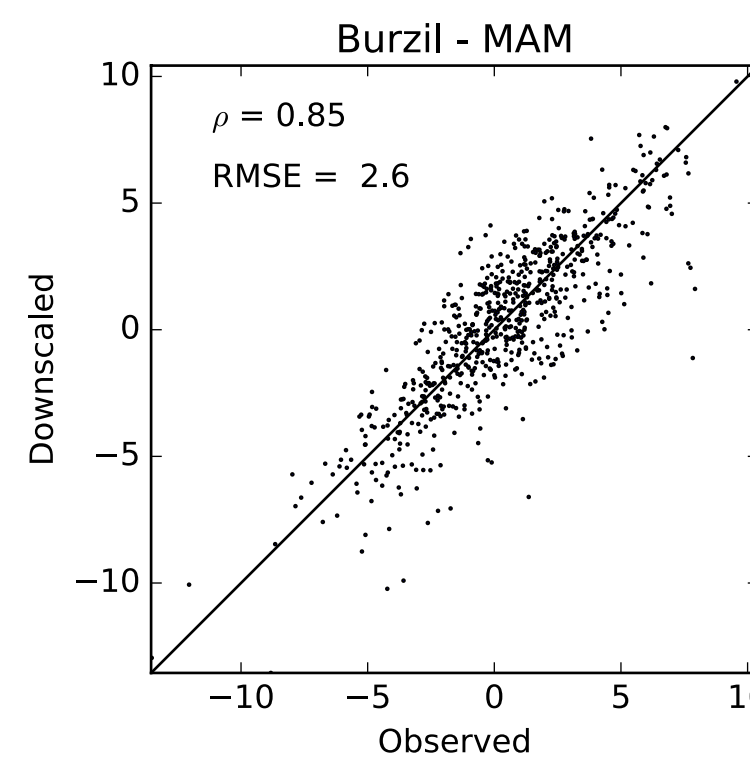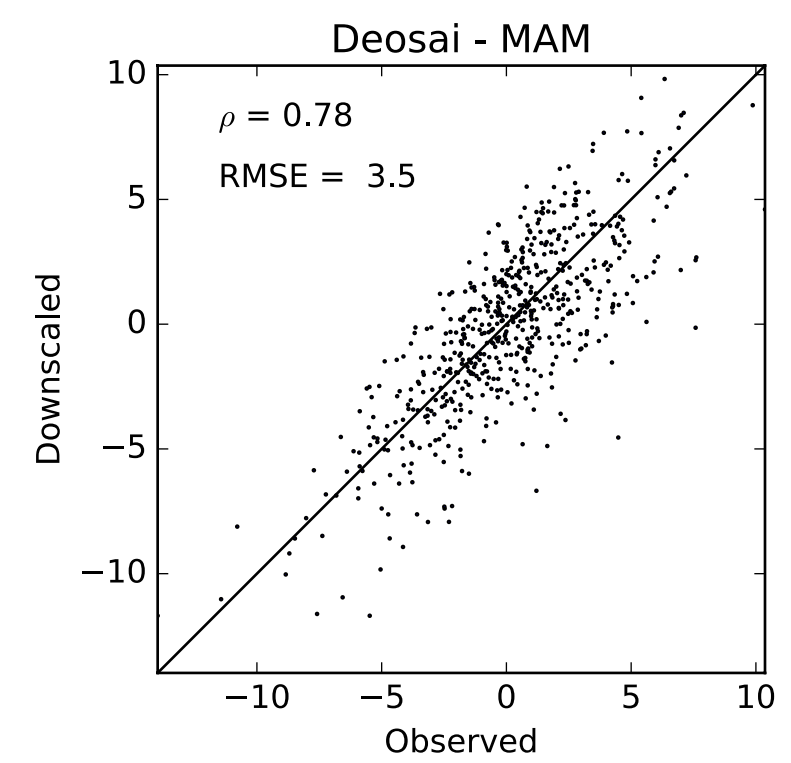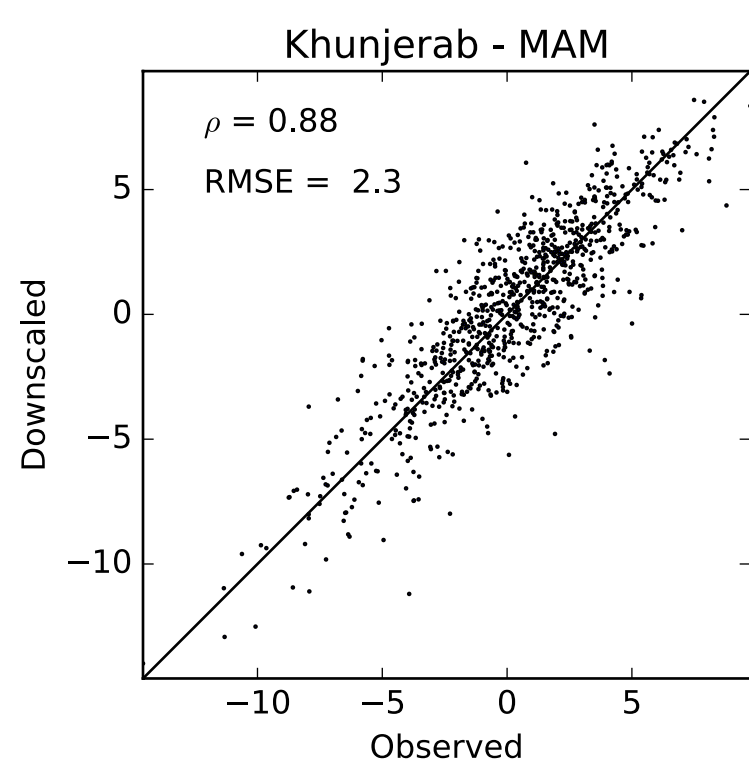

(c)

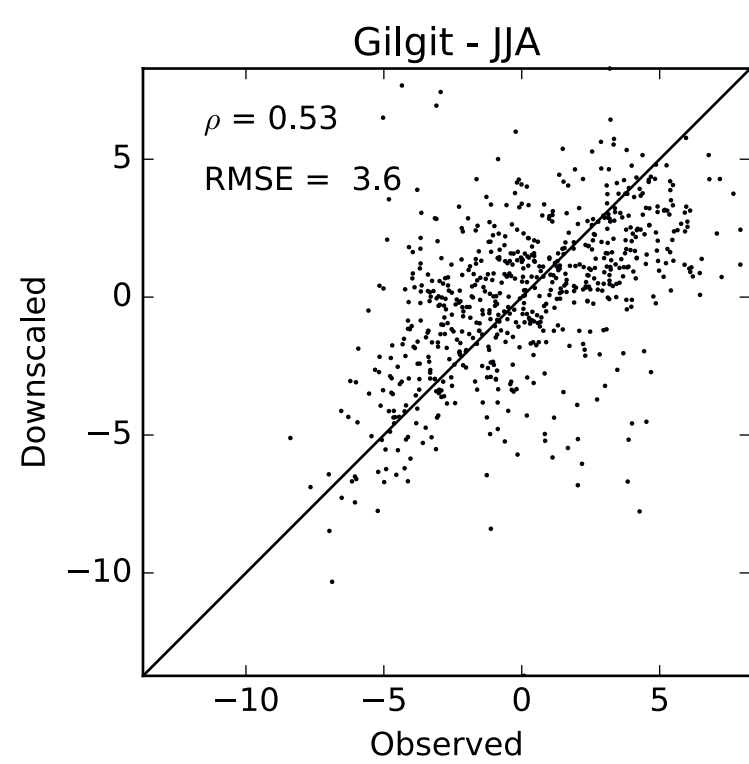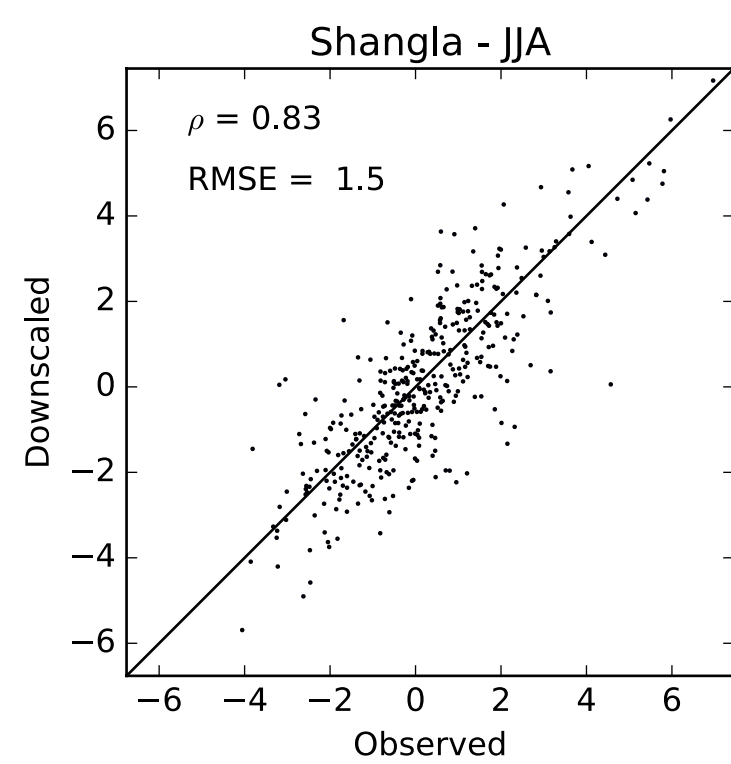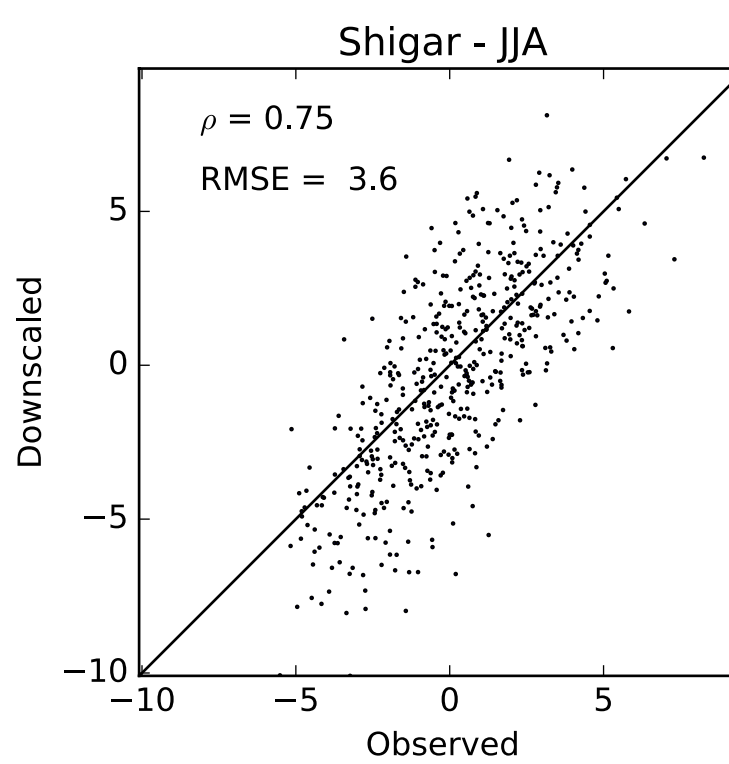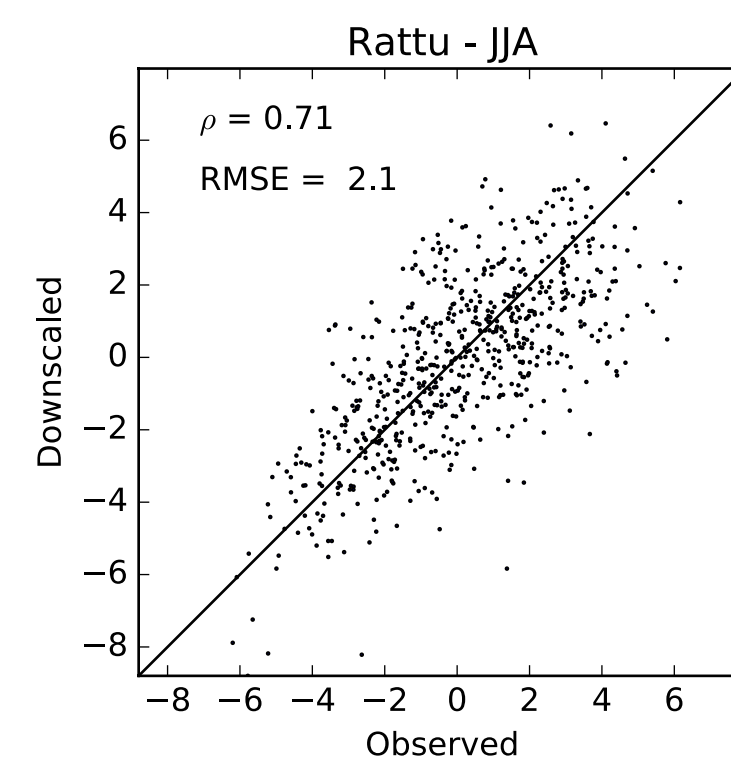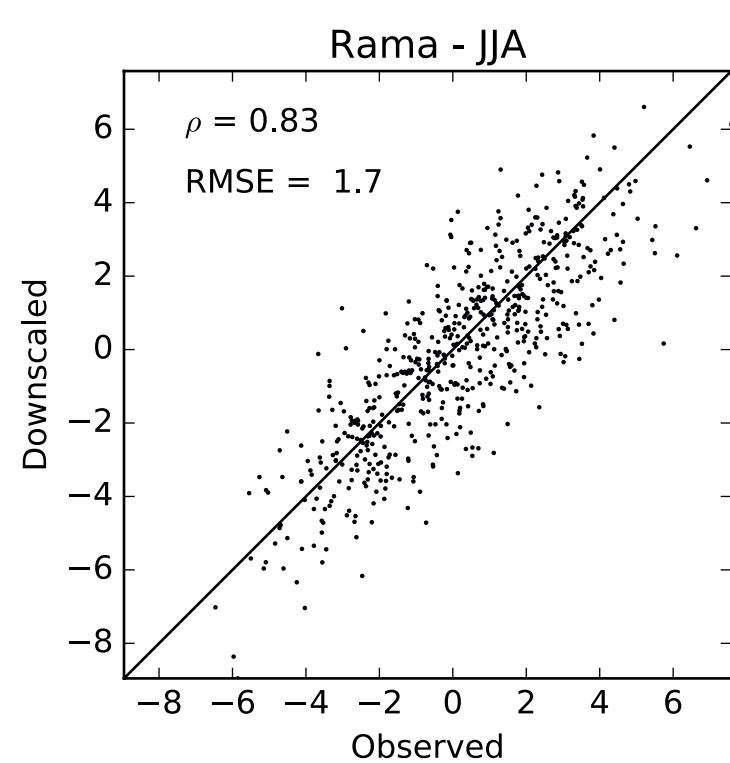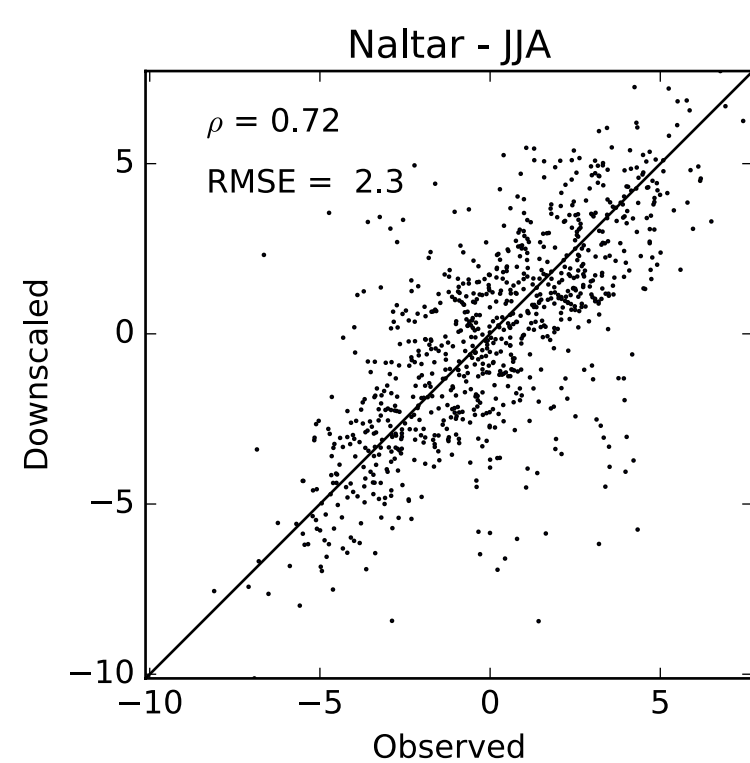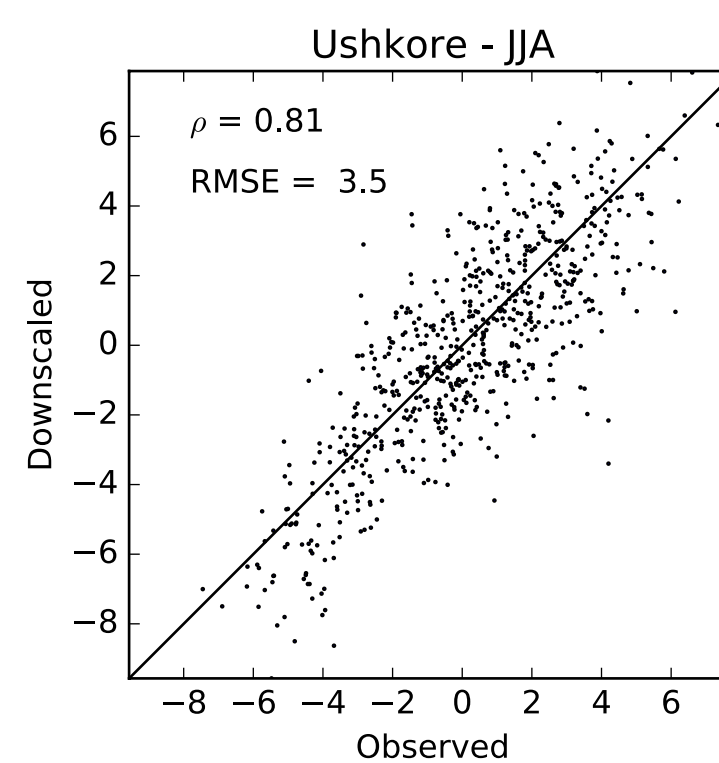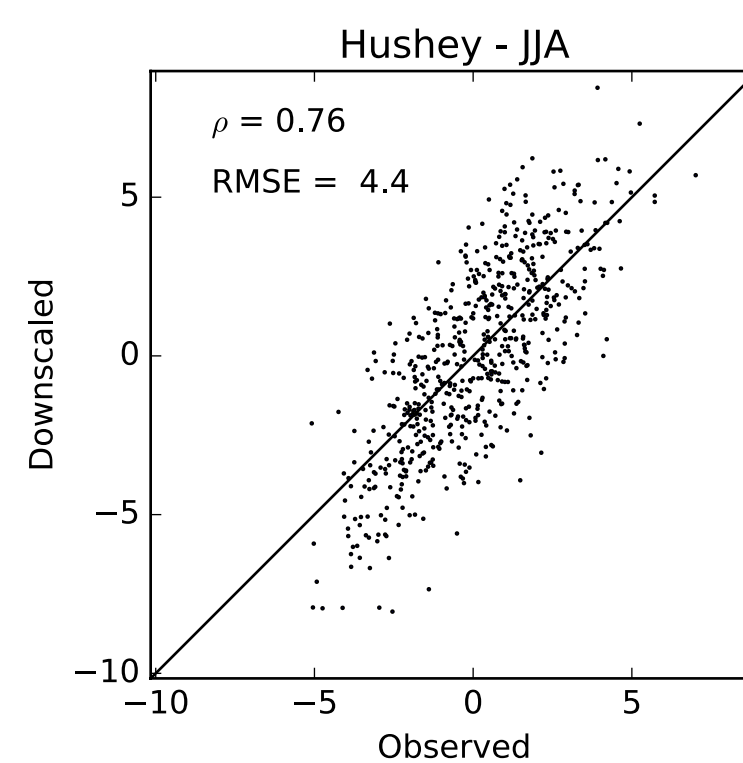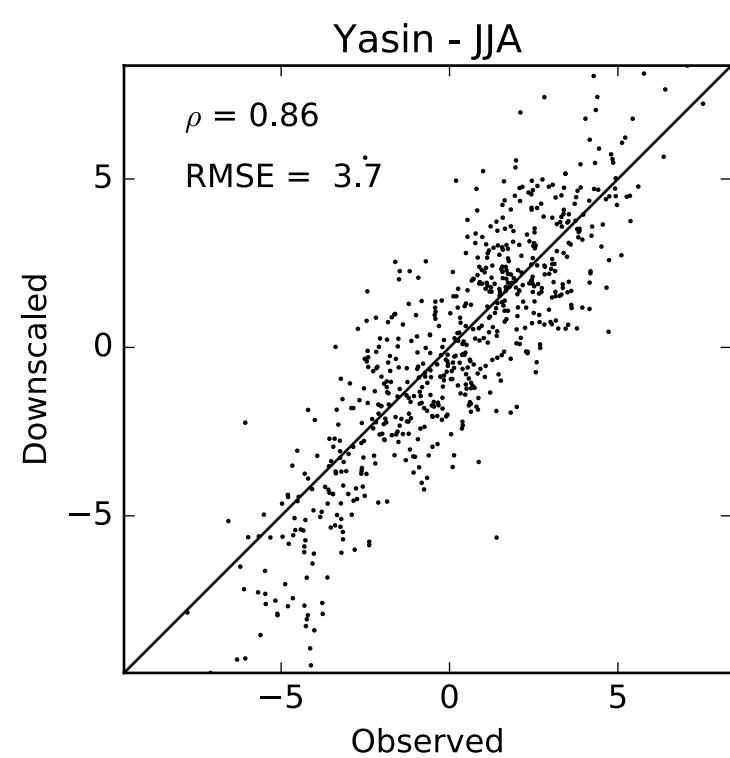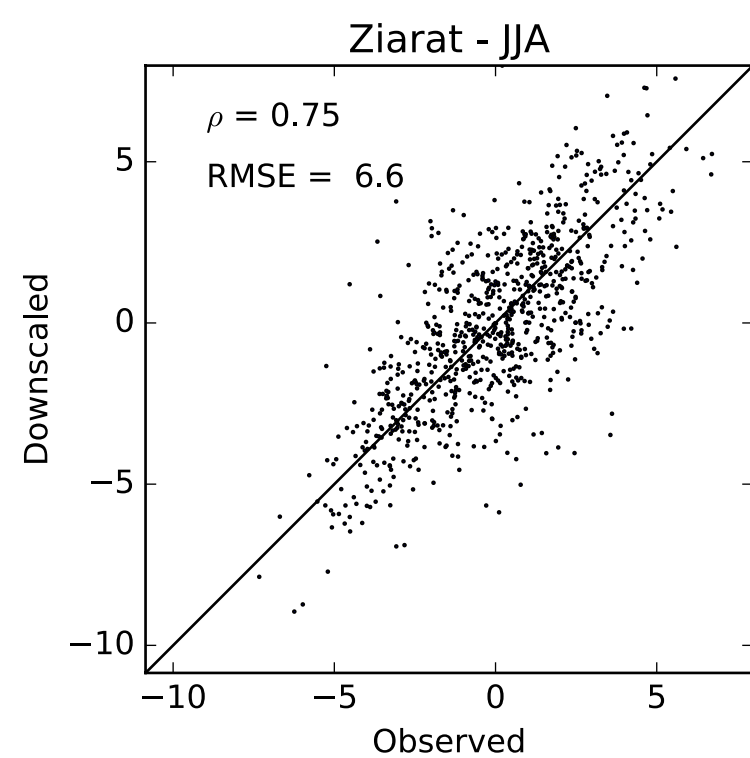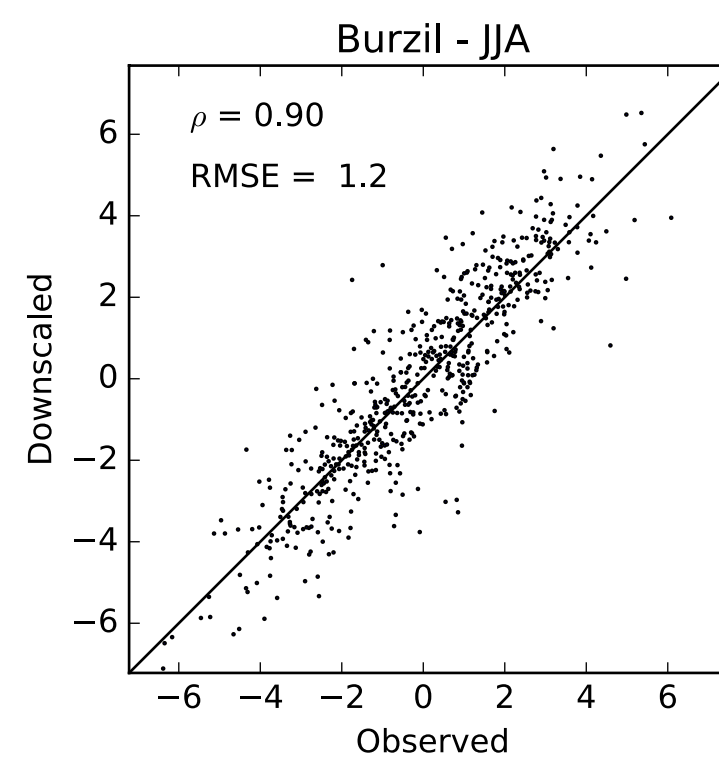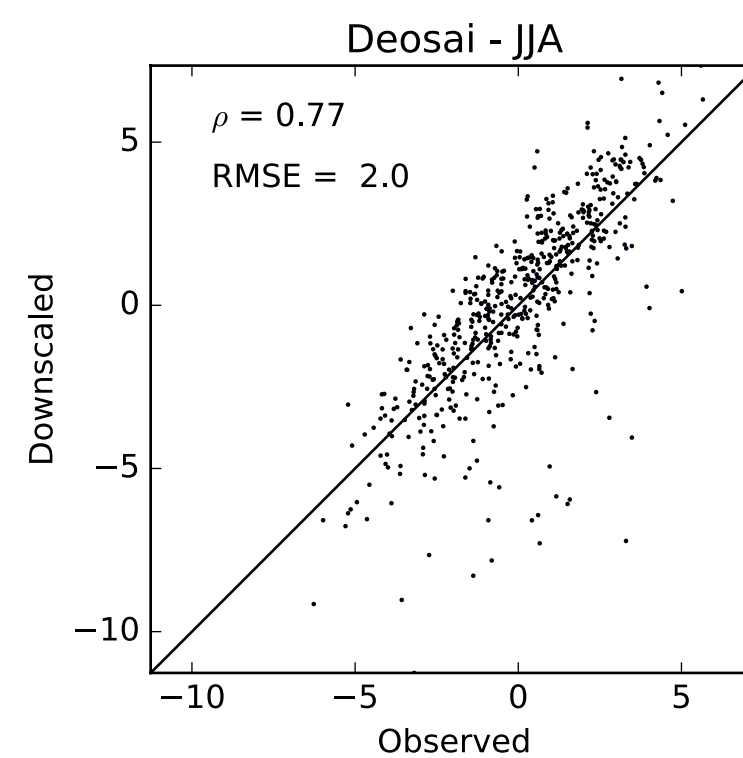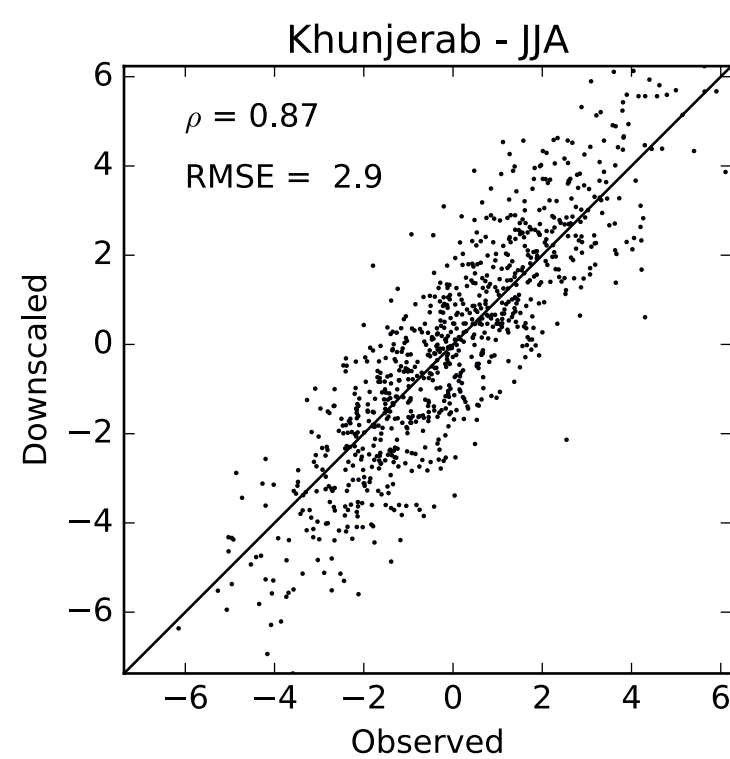

(d)

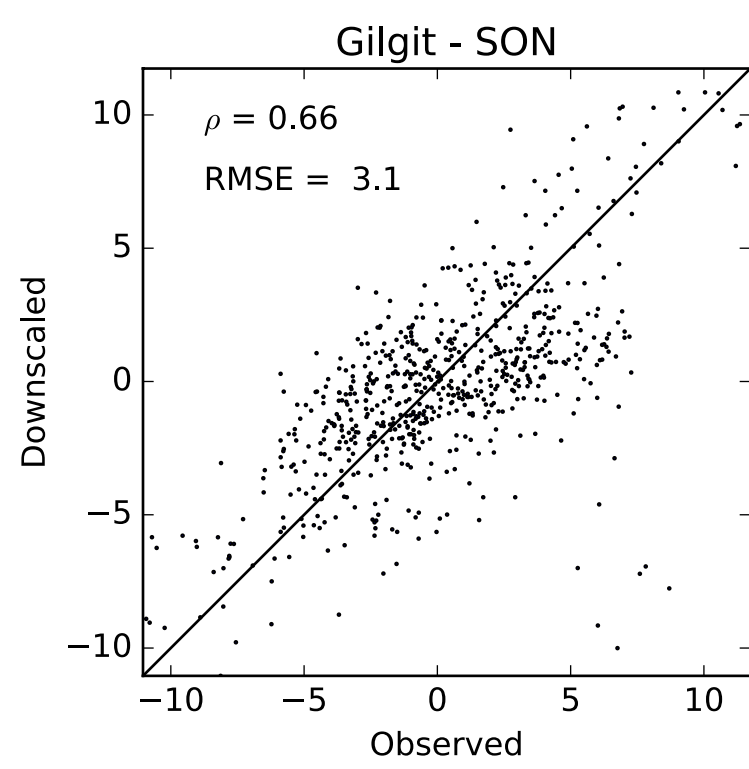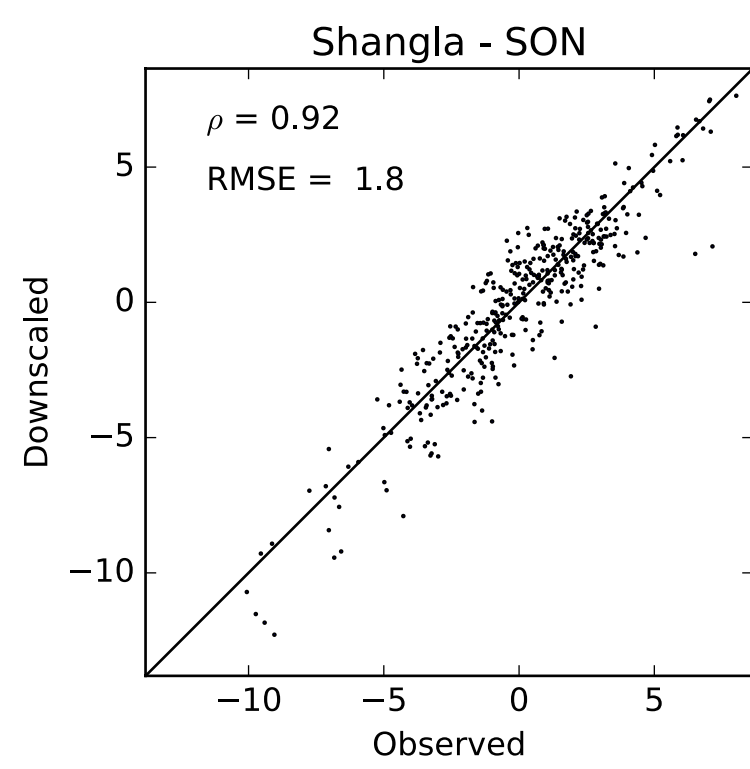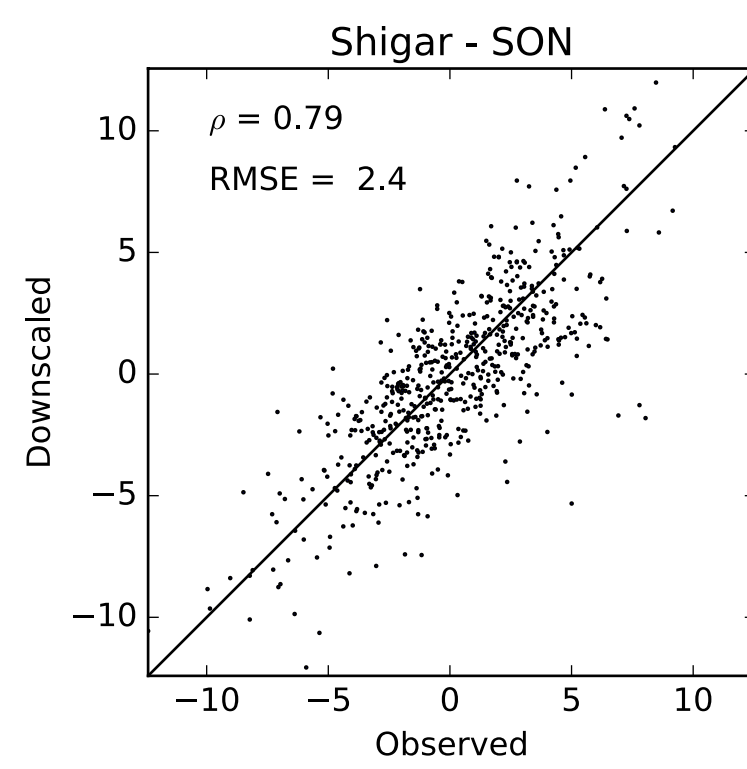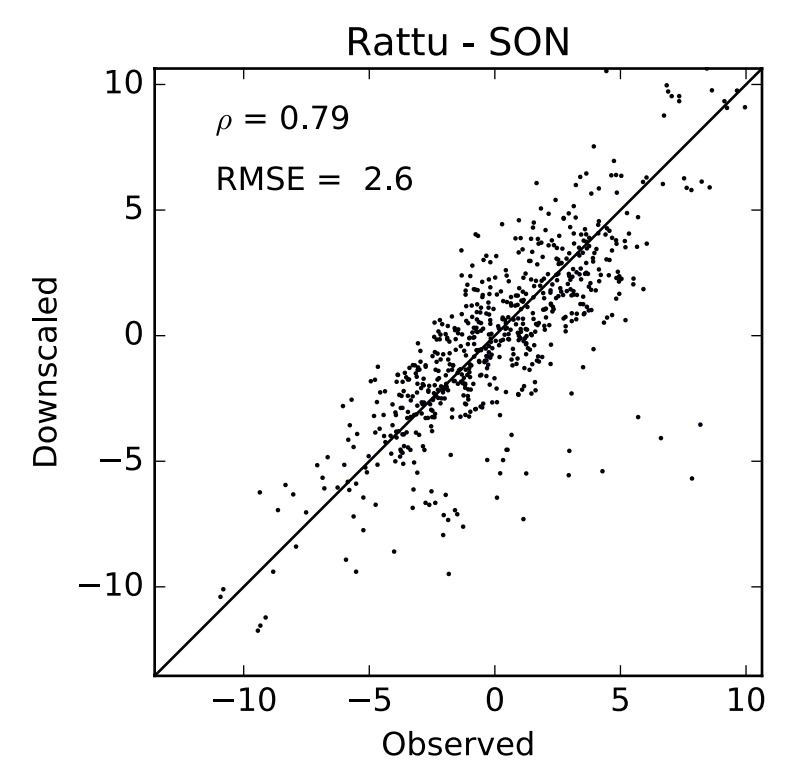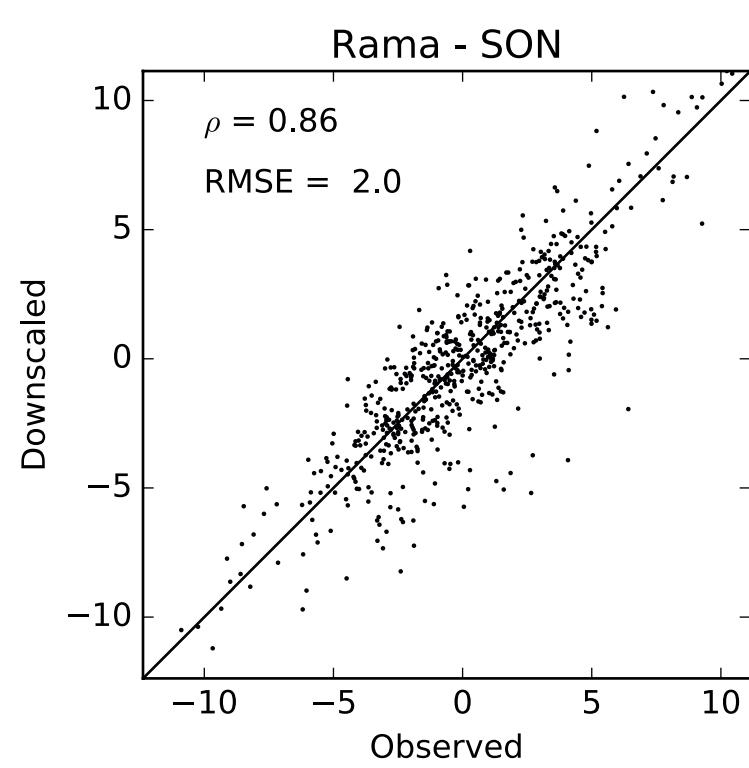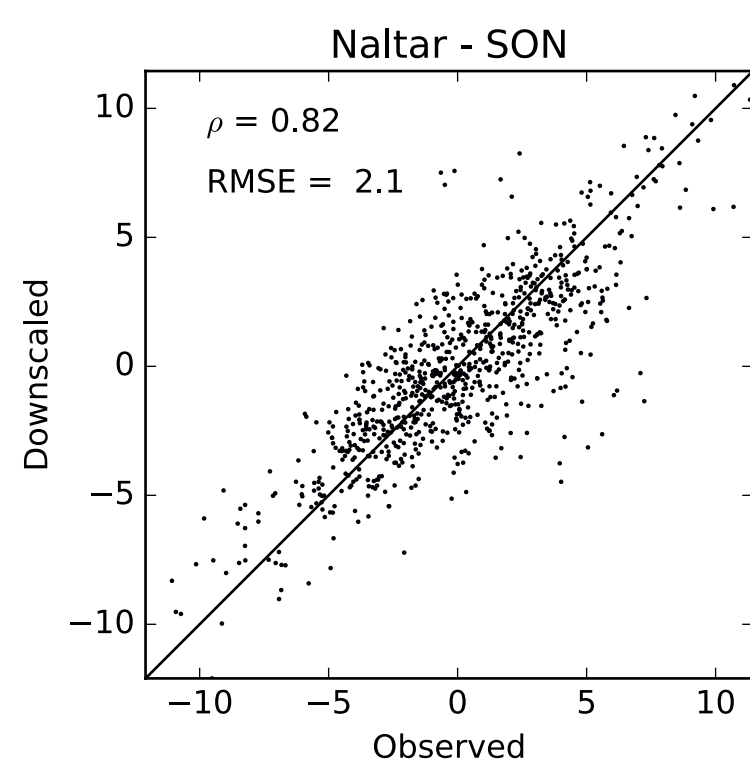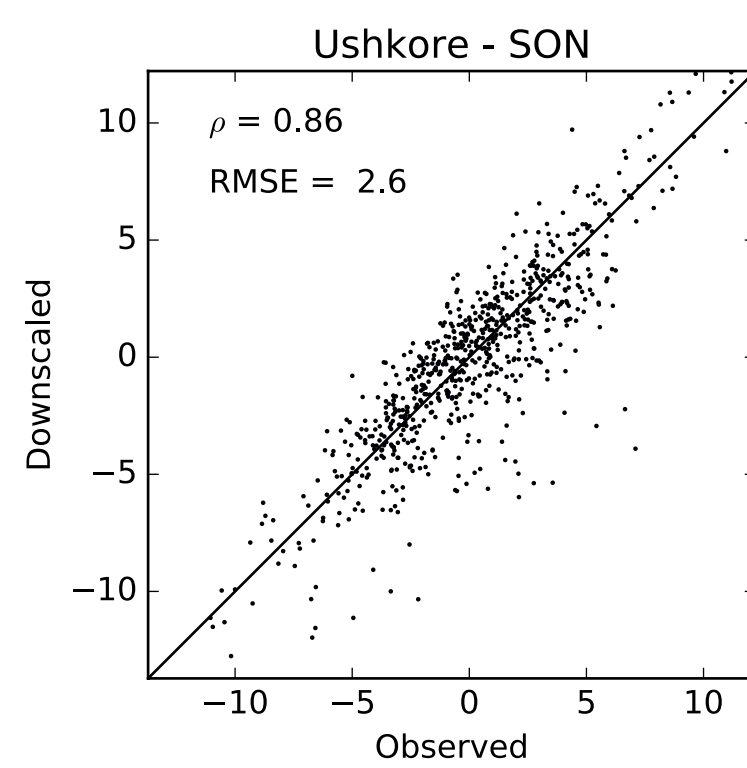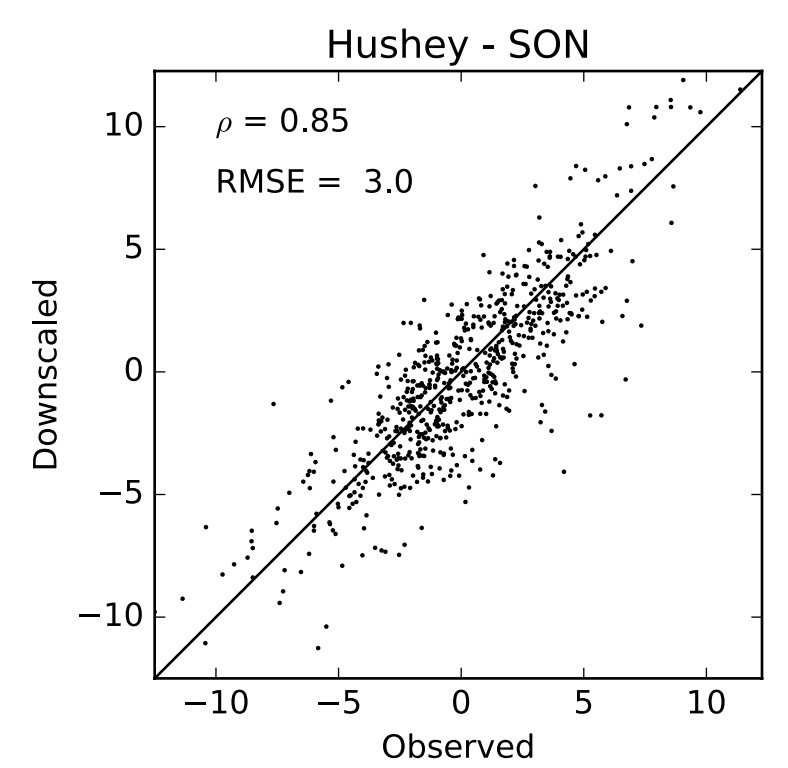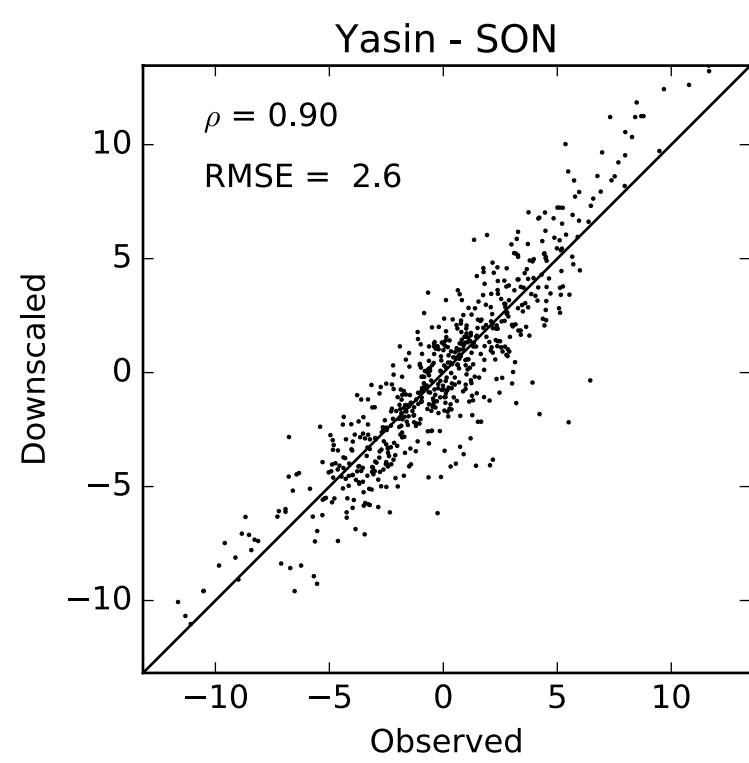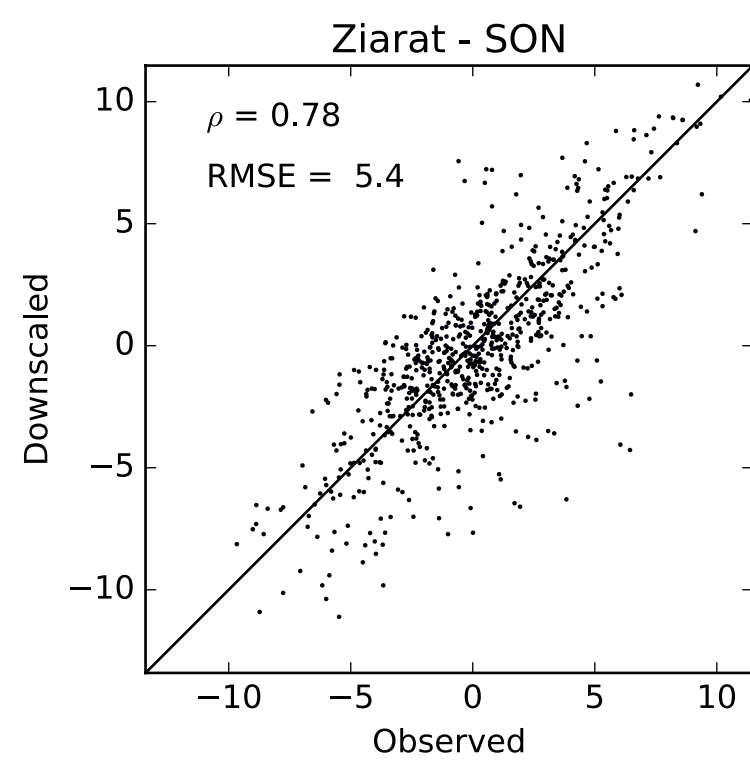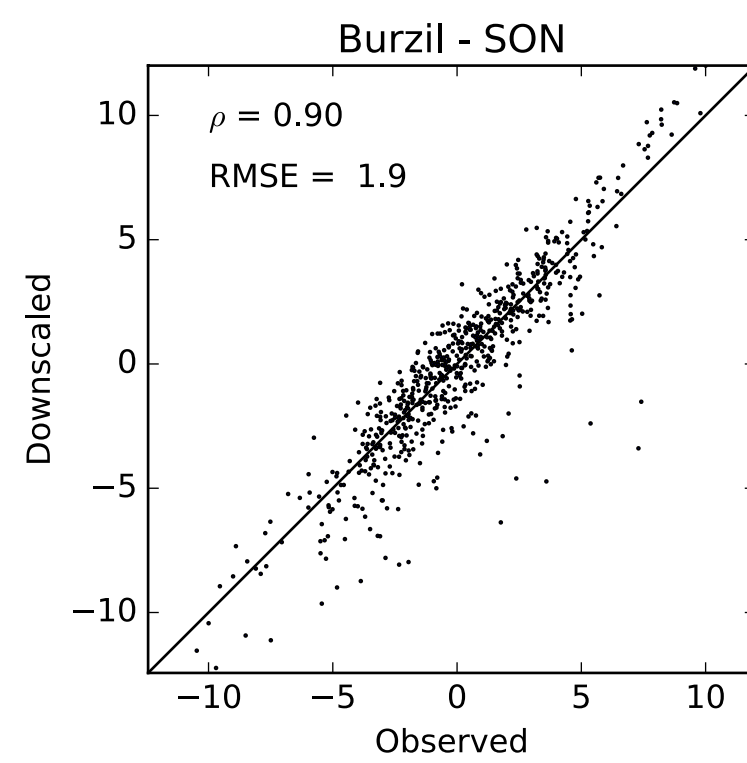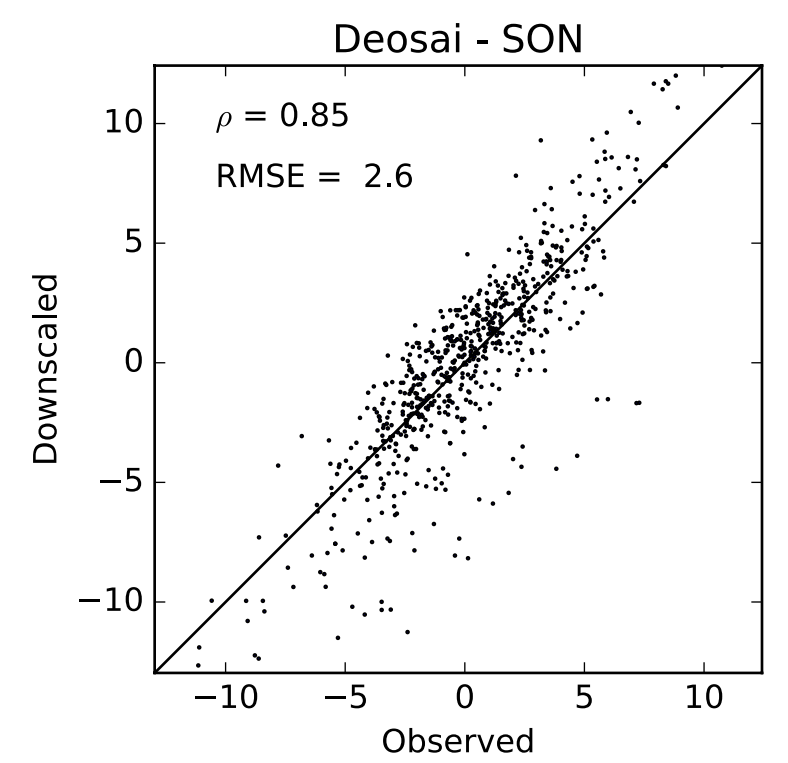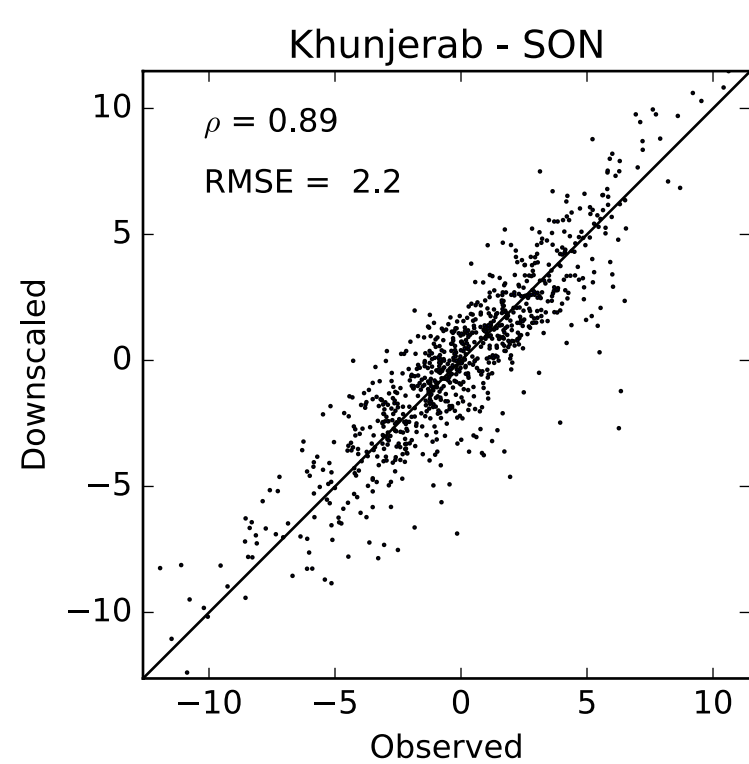

Supplement: 10113_2018_1429_MOESM3_ESM.pdf [file 10113_2018_1429_MOESM3_ESM.pdf]
