# Supplementary material for: Runoff from glacier ice and seasonal snow in High Asia: separating melt water sources in river flow
Source: Springer Nature journal article supplement (doi:10.1007/s10113-018-1429-0), 2018-11-10
Supplement: 10113_2018_1429_MOESM1_ESM.pdf [file 10113_2018_1429_MOESM1_ESM.pdf]

**Journal:** Regional Environmental Change

**Article:** Runoff from glacier ice and seasonal snow in High Asia: separating melt water sources in river flow

**Authors:** Richard L. Armstrong<sup>1,2</sup>, Karl Rittger<sup>1,2</sup>, Mary J. Brodzik<sup>1,2</sup>, Adina Racoviteanu<sup>1,4</sup>, Andrew P. Barrett<sup>1,2</sup>, Siri-Jodha Singh Khalsa<sup>1,2</sup>, Bruce Raup<sup>1,2</sup>, Alice F. Hill<sup>1,2</sup>, Alia Khan<sup>1,2</sup>, Alana M. Wilson<sup>1,2</sup>, Rijan Bhakta Kayastha<sup>4</sup>, Florence Fetterer<sup>1,2</sup>, Betsy Armstrong<sup>1,2</sup>

**Affiliations:** <sup>1</sup>National Snow and Ice Data Center, <sup>2</sup>University of Colorado, <sup>3</sup>Kathmandu University, <sup>4</sup>Aberystwyth University, <sup>5</sup>Institute of Arctic and Alpine Research

**Corresponding author:** Richard L. Armstrong, [rlax@nsidc.org](mailto:rlax@nsidc.org), 303-494-7040

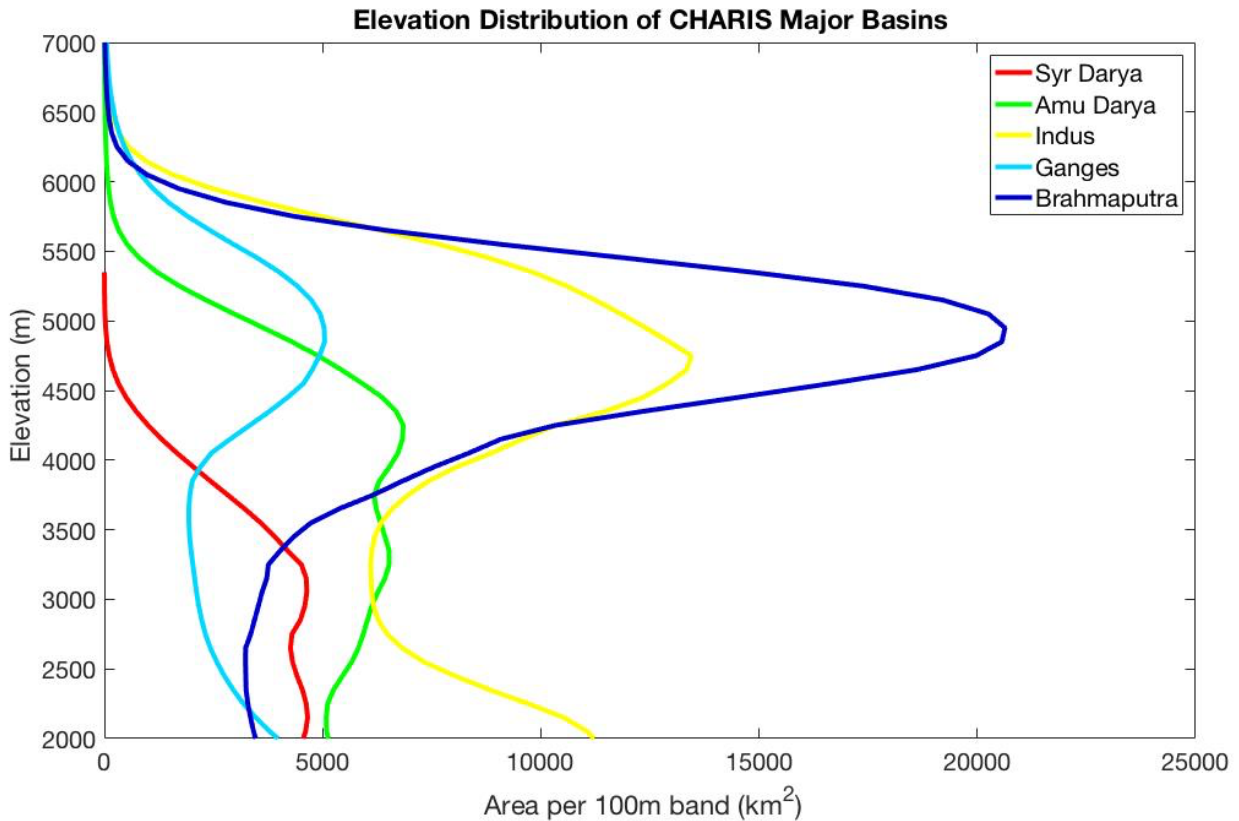

**Fig. S1:** Area-elevation distribution above 2000 m for the five major basins based on the Shuttle Radar Topography Mission (SRTM) digital elevation model (DEM) "SRTMGL3" (NASA JPL 2013).
