# Supplementary material for: Runoff from glacier ice and seasonal snow in High Asia: separating melt water sources in river flow
Source: Springer Nature journal article supplement (doi:10.1007/s10113-018-1429-0), 2018-11-10
Supplement: 10113_2018_1429_MOESM4_ESM.pdf [file 10113_2018_1429_MOESM4_ESM.pdf]

**Journal:** Regional Environmental Change

**Article:** Runoff from glacier ice and seasonal snow in High Asia: separating melt water sources in river flow

**Authors:** Richard L. Armstrong<sup>1,2</sup>, Karl Rittger<sup>1,2</sup>, Mary J. Brodzik<sup>1,2</sup>, Adina Racoviteanu<sup>1,4</sup>, Andrew P. Barrett<sup>1,2</sup>, Siri-Jodha Singh Khalsa<sup>1,2</sup>, Bruce Raup<sup>1,2</sup>, Alice F. Hill<sup>1,2</sup>, Alia Khan<sup>1,2</sup>, Alana M. Wilson<sup>1,2</sup>, Rijan Bhakta Kayastha<sup>4</sup>, Florence Fetterer<sup>1,2</sup>, Betsy Armstrong<sup>1,2</sup>

**Affiliations:** <sup>1</sup>National Snow and Ice Data Center, <sup>2</sup>University of Colorado, <sup>3</sup>Kathmandu University, <sup>4</sup>Aberystwyth University, <sup>5</sup>Institute of Arctic and Alpine Research

**Corresponding author:** Richard L. Armstrong, rla@nsidc.org, 303-494-7040

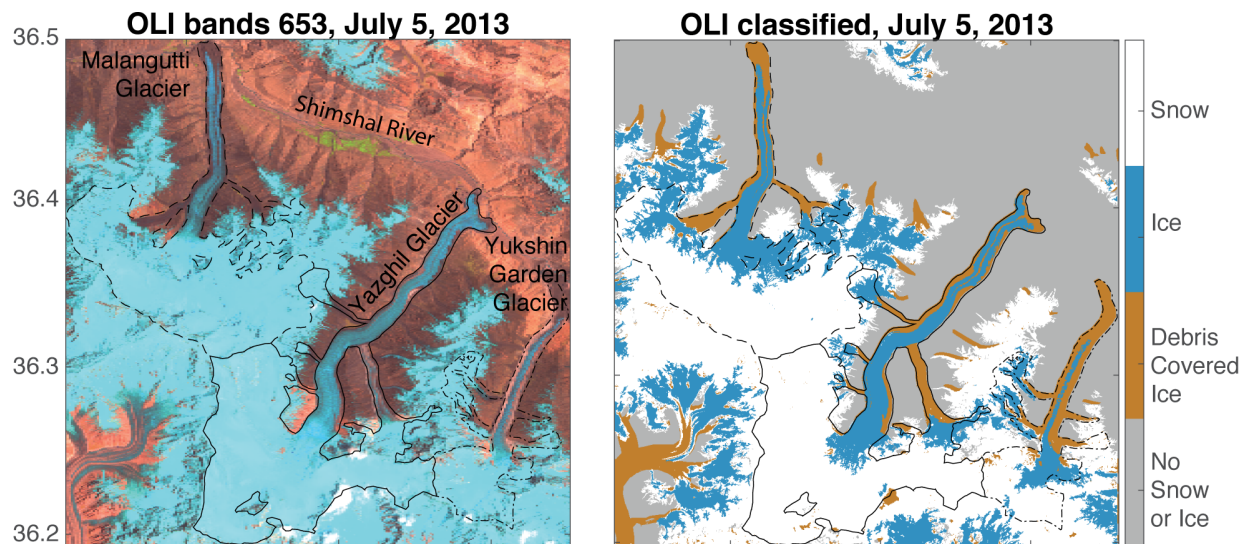

**Fig. S4:** Landsat 8 Operational Land Imager (OLI) false color composites (left) and classified maps (right) in the Hispar Muztagh region on July 05, 2013. Debris covered glaciers are identified using the Randolph Glacier Inventory (Arendt et al., 2013) for visual purposes only.
