# Supplementary material for: Runoff from glacier ice and seasonal snow in High Asia: separating melt water sources in river flow
Source: Springer Nature journal article supplement (doi:10.1007/s10113-018-1429-0), 2018-11-10
Supplement: 10113_2018_1429_MOESM5_ESM.pdf [file 10113_2018_1429_MOESM5_ESM.pdf]

**Journal:** Regional Environmental Change

**Article:** Runoff from glacier ice and seasonal snow in High Asia: separating melt water sources in river flow

**Authors:** Richard L. Armstrong<sup>1,2</sup>, Karl Rittger<sup>1,2</sup>, Mary J. Brodzik<sup>1,2</sup>, Adina Racoviteanu<sup>1,4</sup>, Andrew P. Barrett<sup>1,2</sup>, Siri-Jodha Singh Khalsa<sup>1,2</sup>, Bruce Raup<sup>1,2</sup>, Alice F. Hill<sup>1,2</sup>, Alia Khan<sup>1,2</sup>, Alana M. Wilson<sup>1,2</sup>, Rijan Bhakta Kayastha<sup>4</sup>, Florence Fetterer<sup>1,2</sup>, Betsy Armstrong<sup>1,2</sup>

**Affiliations:** <sup>1</sup>National Snow and Ice Data Center, <sup>2</sup>University of Colorado, <sup>3</sup>Kathmandu University, <sup>4</sup>Aberystwyth University, <sup>5</sup>Institute of Arctic and Alpine Research

**Corresponding author:** Richard L. Armstrong, [rlax@nsidc.org](mailto:rlax@nsidc.org), 303-494-7040

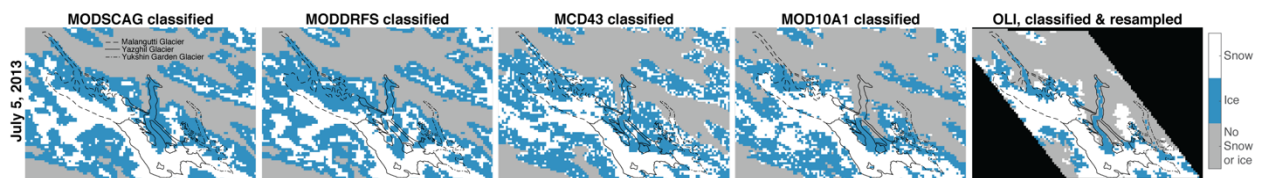

**Fig. S5:** Snow-Ice discrimination based on comparison with Landsat Operational Land Imager (*OLI*) for Moderate Resolution Imaging Spectroradiometer (MODIS) Snow Covered Area and Grain size (MODSCAG) (column 1), MODIS Dust Radiative Forcing in Snow (MODDRFS) (column 2), MCD43 (column 3), MOD10A1 (column 4), and coarsened Landsat (column 5) for July 5th, 2013
