# Supplementary material for: Runoff from glacier ice and seasonal snow in High Asia: separating melt water sources in river flow
Source: Springer Nature journal article supplement (doi:10.1007/s10113-018-1429-0), 2018-11-10
Supplement: 10113_2018_1429_MOESM6_ESM.pdf [file 10113_2018_1429_MOESM6_ESM.pdf]

**Journal:** Regional Environmental Change

**Article:** Runoff from glacier ice and seasonal snow in High Asia: separating melt water sources in river flow

**Authors:** Richard L. Armstrong<sup>1,2</sup>, Karl Rittger<sup>1,2</sup>, Mary J. Brodzik<sup>1,2</sup>, Adina Racoviteanu<sup>1,4</sup>, Andrew P. Barrett<sup>1,2</sup>, Siri-Jodha Singh Khalsa<sup>1,2</sup>, Bruce Raup<sup>1,2</sup>, Alice F. Hill<sup>1,2</sup>, Alia Khan<sup>1,2</sup>, Alana M. Wilson<sup>1,2</sup>, Rijan Bhakta Kayastha<sup>4</sup>, Florence Fetterer<sup>1,2</sup>, Betsy Armstrong<sup>1,2</sup>

**Affiliations:** <sup>1</sup>National Snow and Ice Data Center, <sup>2</sup>University of Colorado, <sup>3</sup>Kathmandu University, <sup>4</sup>Aberystwyth University, <sup>5</sup>Institute of Arctic and Alpine Research

**Corresponding author:** Richard L. Armstrong, [rlax@nsidc.org](mailto:rlax@nsidc.org), 303-494-7040

**Table S1:** Expanded content used to derive Table 2, including rainfall and modeled melt volumes. CHARIS major basins, above indicated gauge location and above 2000 m. Basin delineation based on shapefiles from the Global Runoff Data Centre (GRDC), with the outline of the Indus modified to remove a lobe in the northeast portion of the Upper Indus, as identified by Khan et al. (2014). Basin areas include internal endorheic basins. Persistent snow and ice area estimated from MODICE (2 Strikes, 2001-2014). Relative percent contributions calculated with respect to sum of Rain (Aphrodite V1101R2), and modeled melt from: Snow on Land (SOL), Snow on Ice (SOI), and Exposed Glacier Ice (EGI), for elevations above 2,000 m.

| Basin       | Gauge Name  | Basin Area (km <sup>2</sup> ) | Basin Area >2000 m (km <sup>2</sup> ) | MODICE Area >2000 m (km <sup>2</sup> ) | MODICE Area >2000 m (%) | Rain (km <sup>3</sup> ) | SOL Melt (km <sup>3</sup> ) | SOI Melt (km <sup>3</sup> ) | EGI Melt (km <sup>3</sup> ) | Rain (%) | SOL Melt (%) | SOI Melt (%) | EGI Melt (%) |
|-------------|-------------|-------------------------------|---------------------------------------|----------------------------------------|-------------------------|-------------------------|-----------------------------|-----------------------------|-----------------------------|----------|--------------|--------------|--------------|
| Syr Darya   | Tyumen-Aryk | 249,068                       | 86,937                                | 2,540                                  | 2.9                     | 16.7                    | 51.4                        | 1.7                         | 1.6                         | 23       | 72           | 2            | 2            |
| Amu Darya   | Chatly      | 451,074                       | 187,387                               | 12,899                                 | 6.9                     | 20.2                    | 56.4                        | 3.7                         | 6.6                         | 23       | 65           | 4            | 8            |
| Indus       | Kotri       | 820,659                       | 349,972                               | 31,187                                 | 8.9                     | 76.3                    | 218.3                       | 20.1                        | 9.1                         | 23       | 67           | 6            | 3            |
| Ganges      | Paksey      | 943,244                       | 123,483                               | 11,484                                 | 9.3                     | 91.7                    | 74.2                        | 6.9                         | 1.6                         | 52       | 43           | 4            | <1           |
| Brahmaputra | Bahadurabad | 514,383                       | 344,977                               | 21,648                                 | 6.3                     | 167.6                   | 421.7                       | 45.6                        | 7.4                         | 26       | 66           | 7            | 1            |
