# Supplementary material for: Runoff from glacier ice and seasonal snow in High Asia: separating melt water sources in river flow
Source: Springer Nature journal article supplement (doi:10.1007/s10113-018-1429-0), 2018-11-10
Supplement: 10113_2018_1429_MOESM7_ESM.pdf [file 10113_2018_1429_MOESM7_ESM.pdf]

**Journal:** Regional Environmental Change

**Article:** Runoff from glacier ice and seasonal snow in High Asia: separating melt water sources in river flow

**Authors:** Richard L. Armstrong<sup>1,2</sup>, Karl Rittger<sup>1,2</sup>, Mary J. Brodzik<sup>1,2</sup>, Adina Racoviteanu<sup>1,4</sup>, Andrew P. Barrett<sup>1,2</sup>, Siri-Jodha Singh Khalsa<sup>1,2</sup>, Bruce Raup<sup>1,2</sup>, Alice F. Hill<sup>1,2</sup>, Alia Khan<sup>1,2</sup>, Alana M. Wilson<sup>1,2</sup>, Rijan Bhakta Kayastha<sup>4</sup>, Florence Fetterer<sup>1,2</sup>, Betsy Armstrong<sup>1,2</sup>

**Affiliations:** <sup>1</sup>National Snow and Ice Data Center, <sup>2</sup>University of Colorado, <sup>3</sup>Kathmandu University, <sup>4</sup>Aberystwyth University, <sup>5</sup>Institute of Arctic and Alpine Research

**Corresponding author:** Richard L. Armstrong, rlx@nsidc.org, 303-494-7040

**Table S2:** Total volume of discharge contributions of melt from: Snow on Land (SOL), Snow on Ice (SOI), and Exposed Glacier Ice (EGI), every 1000m, from 6000m to 1000m for each basin. 1,000m elevation bands are noted by the lower elevation threshold (i.e., “4,000m” represents 4,000-5,000m band).

| Syr Darya      |                                           |                                          |                                                  | Amu Darya                                 |                                          |                                                  |
|----------------|-------------------------------------------|------------------------------------------|--------------------------------------------------|-------------------------------------------|------------------------------------------|--------------------------------------------------|
| Elevation Band | Melt from Snow on Land (km <sup>3</sup> ) | Melt from Snow on Ice (km <sup>3</sup> ) | Melt from Exposed Glacier Ice (km <sup>3</sup> ) | Melt from Snow on Land (km <sup>3</sup> ) | Melt from Snow on Ice (km <sup>3</sup> ) | Melt from Exposed Glacier Ice (km <sup>3</sup> ) |
| 6000           | n/a                                       | n/a                                      | n/a                                              | 0.2                                       | 0.4                                      | 0.6                                              |
| 5000           | 1.2                                       | 1.1                                      | 0.8                                              | 8.1                                       | 2.7                                      | 4.3                                              |
| 4000           | 19.4                                      | 0.6                                      | 0.8                                              | 24.5                                      | 0.7                                      | 1.7                                              |
| 3000           | 30.8                                      | 0                                        | 0                                                | 23.7                                      | 0                                        | 0                                                |
| 2000           | 1.1                                       | 0                                        | 0                                                | 0.7                                       | 0                                        | 0                                                |
| 1000           | 0                                         | 0                                        | 0                                                | 0                                         | 0                                        | 0                                                |

  

| Indus          |                                           |                                          |                                                  | Ganges                                    |                                          |                                                  |
|----------------|-------------------------------------------|------------------------------------------|--------------------------------------------------|-------------------------------------------|------------------------------------------|--------------------------------------------------|
| Elevation Band | Melt from Snow on Land (km <sup>3</sup> ) | Melt from Snow on Ice (km <sup>3</sup> ) | Melt from Exposed Glacier Ice (km <sup>3</sup> ) | Melt from Snow on Land (km <sup>3</sup> ) | Melt from Snow on Ice (km <sup>3</sup> ) | Melt from Exposed Glacier Ice (km <sup>3</sup> ) |
| 6000           | 7.3                                       | 7.8                                      | 2.7                                              | 8.8                                       | 4.6                                      | 1                                                |
| 5000           | 61.4                                      | 11.7                                     | 5.7                                              | 30.7                                      | 2.2                                      | 0.7                                              |
| 4000           | 83.5                                      | 0.6                                      | 0.6                                              | 22.1                                      | 0                                        | 0                                                |
| 3000           | 66                                        | 0                                        | 0                                                | 12.5                                      | 0                                        | 0                                                |
| 2000           | 1.1                                       | 0                                        | 0                                                | 0.2                                       | 0                                        | 0                                                |
| 1000           | 0                                         | 0                                        | 0                                                | 0                                         | 0                                        | 0                                                |

  

| Brahmaputra    |                                           |                                          |                                                  |
|----------------|-------------------------------------------|------------------------------------------|--------------------------------------------------|
| Elevation Band | Melt from Snow on Land (km <sup>3</sup> ) | Melt from Snow on Ice (km <sup>3</sup> ) | Melt from Exposed Glacier Ice (km <sup>3</sup> ) |
| 6000           | 87.7                                      | 18.4                                     | 2.2                                              |
| 5000           | 177.2                                     | 26.2                                     | 4.7                                              |
| 4000           | 121.2                                     | 1                                        | 0.5                                              |
| 3000           | 35.6                                      | 0                                        | 0                                                |
| 2000           | 0.4                                       | 0                                        | 0                                                |
| 1000           | 0                                         | 0                                        | 0                                                |
