# Supplementary material for: Runoff from glacier ice and seasonal snow in High Asia: separating melt water sources in river flow
Source: Springer Nature journal article supplement (doi:10.1007/s10113-018-1429-0), 2018-11-10
Supplement: 10113_2018_1429_MOESM8_ESM.pdf [file 10113_2018_1429_MOESM8_ESM.pdf]

**Journal:** Regional Environmental Change

**Article:** Runoff from glacier ice and seasonal snow in High Asia: separating melt water sources in river flow

**Authors:** Richard L. Armstrong<sup>1,2</sup>, Karl Rittger<sup>1,2</sup>, Mary J. Brodzik<sup>1,2</sup>, Adina Racoviteanu<sup>1,4</sup>, Andrew P. Barrett<sup>1,2</sup>, Siri-Jodha Singh Khalsa<sup>1,2</sup>, Bruce Raup<sup>1,2</sup>, Alice F. Hill<sup>1,2</sup>, Alia Khan<sup>1,2</sup>, Alana M. Wilson<sup>1,2</sup>, Rijan Bhakta Kayastha<sup>4</sup>, Florence Fetterer<sup>1,2</sup>, Betsy Armstrong<sup>1,2</sup>

**Affiliations:** <sup>1</sup>National Snow and Ice Data Center, <sup>2</sup>University of Colorado, <sup>3</sup>Kathmandu University, <sup>4</sup>Aberystwyth University, <sup>5</sup>Institute of Arctic and Alpine Research

**Corresponding author:** Richard L. Armstrong, [rlax@nsidc.org](mailto:rlax@nsidc.org), 303-494-7040

**Table S3:** Melt model calibration basin degree-day factors (DDFs) for best overall models, years, and calibration statistics. Minimum and maximum snow (ice) DDFs used as extrema for seasonally-adjusted sine curve for melt model snow (ice) DDFs.

| Basin     | Major Basin | Min Snow DDF (mm °C <sup>-1</sup> day <sup>-1</sup> ) | Max Snow DDF (mm °C <sup>-1</sup> day <sup>-1</sup> ) | Min Ice DDF (mm °C <sup>-1</sup> day <sup>-1</sup> ) | Max Ice DDF (mm °C <sup>-1</sup> day <sup>-1</sup> ) | Calibration Years | Annual Volumetric Difference (%) | Monthly RMSE (km <sup>3</sup> ) |
|-----------|-------------|-------------------------------------------------------|-------------------------------------------------------|------------------------------------------------------|------------------------------------------------------|-------------------|----------------------------------|---------------------------------|
| Naryn     | SY          | 4.61                                                  | 5.49                                                  | 53.30                                                | 57.16                                                | 2003, 2005, 2007  | 0.4                              | 0.25                            |
| Vakhsh    | AM          | 2.38                                                  | 4.86                                                  | 55.86                                                | 56.94                                                | 2004, 2005, 2007  | 2.6                              | 1.27                            |
| Hunza     | IN          | 10.41                                                 | 10.48                                                 | 37.94                                                | 42.30                                                | 2001, 2002, 2003  | 0.1                              | 0.39                            |
| Karnali   | GA          | 17.42                                                 | 17.60                                                 | 57.32                                                | 57.41                                                | 2001, 2003, 2004  | 3.8                              | 1.25                            |
| SaptaKosi | BR          | 32.98                                                 | 33.09                                                 | 35.52                                                | 49.53                                                | 2003, 2004, 2005  | 0.1                              | 2.82                            |
